# Supplementary material
Source: PubMed Central journal article supplement (PMC8262560)
Supplement: jci-131-135166-s152.pdf [file jci-131-135166-s152.pdf]

Supplementary Materials for

**Immunoregulatory and lipid presentation pathways are upregulated in human face  
transplant rejection**

Thet Su Win, William J. Crisler, Beatrice Dyring-Andersen, Rachel Lopdrup, Jessica E. Teague,  
Victor Barrera, Shannan Ho Sui, Sotirios Tasigiorgos, Naoka Murakami, Anil Chandraker,  
Stefan G. Tullius, Bohdan Pomahac, Leonardo V. Riella, Rachael A. Clark

**Address for Correspondence**

\*Rachael A. Clark M.D., Ph.D.

Email: [rclark@bwh.harvard.edu](mailto:rclark@bwh.harvard.edu)

Brigham and Women's Hospital

EBRC 501A, 221 Longwood Avenue, Boston, MA 02115

Tel: (617) 525-8509

\*Leonardo V. Riella M.D., Ph.D.

Email: [lriella@bwh.harvard.edu](mailto:lriella@bwh.harvard.edu)

Brigham and Women's Hospital

221 Longwood Avenue, Boston, MA 02115

Tel: (617) 732-5500

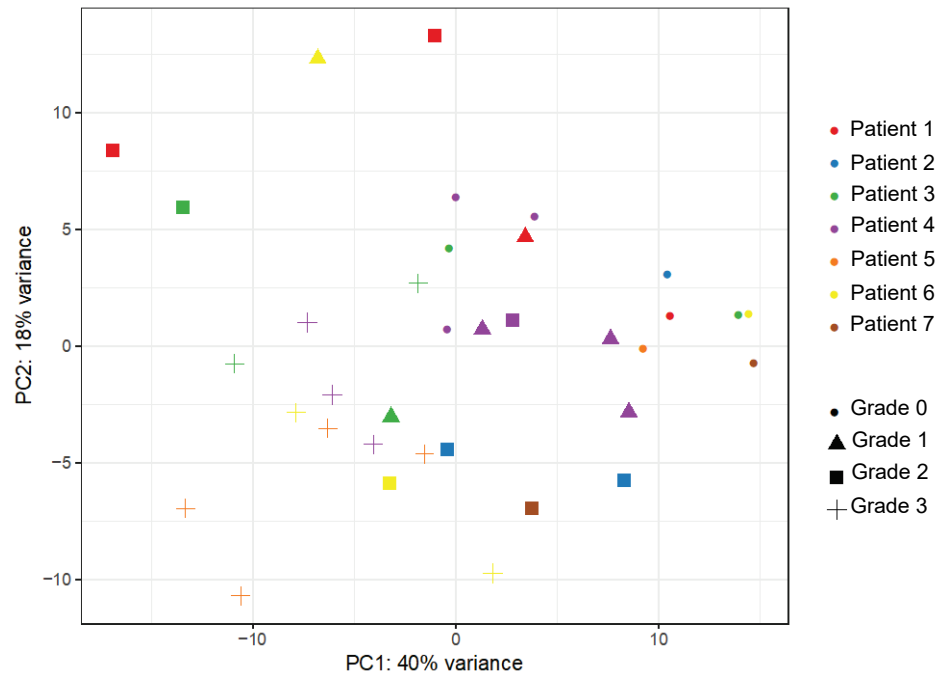

**Supplementary Figure 1. Principal component analysis revealed that the samples clustered on the basis of rejection status.**

Unsupervised principal component analysis of all allograft biopsies (n = 35) included in the analyses of the study revealed that the samples clustered on the basis of rejection status irrespective of the origin of the biopsies.

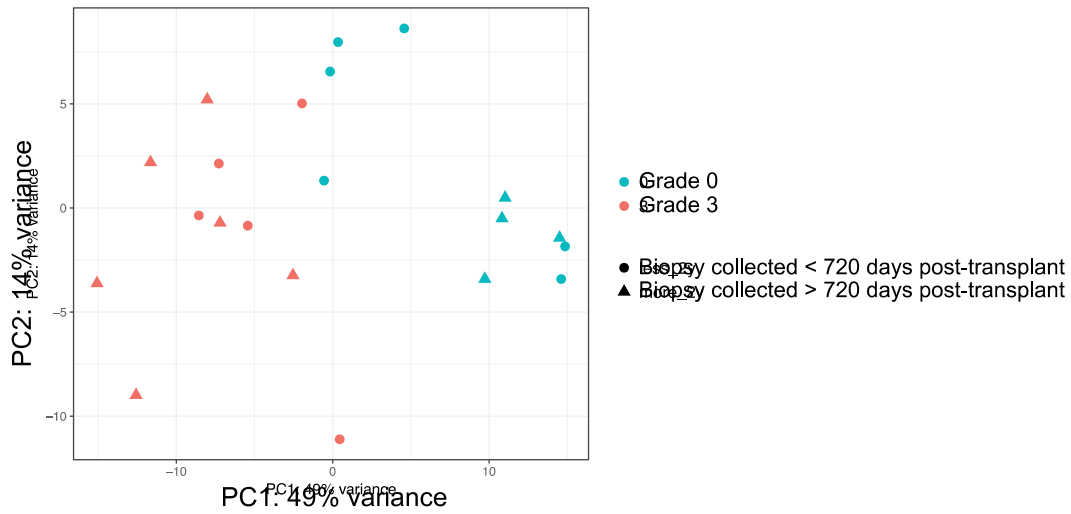

**Supplementary Figure 2. Biopsies did not cluster on the basis of the time of biopsy collection.** Unsupervised principal component analysis revealed that the biopsy samples (Grade 0, n = 10; Grade 3, n = 11) clustered on the basis of rejection status irrespective of the time of biopsy collection from transplantation.

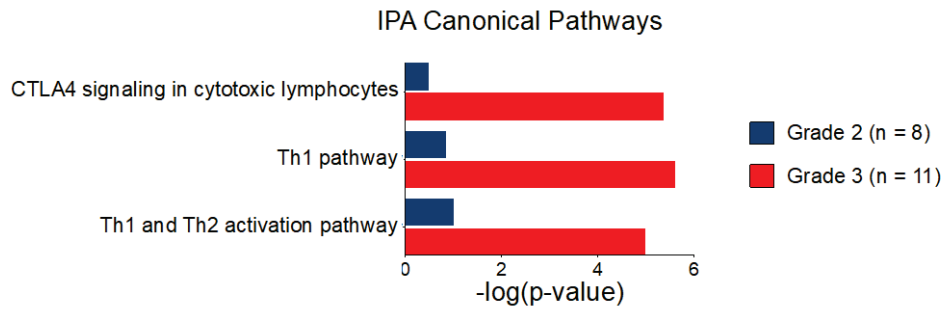

**Supplementary Figure 3. Ingenuity pathway analysis identified progressive enrichment of T cell associated pathways with increasing severity of rejection.**

Benjamini-Hochberg corrected Fischer's exact test P values are shown.

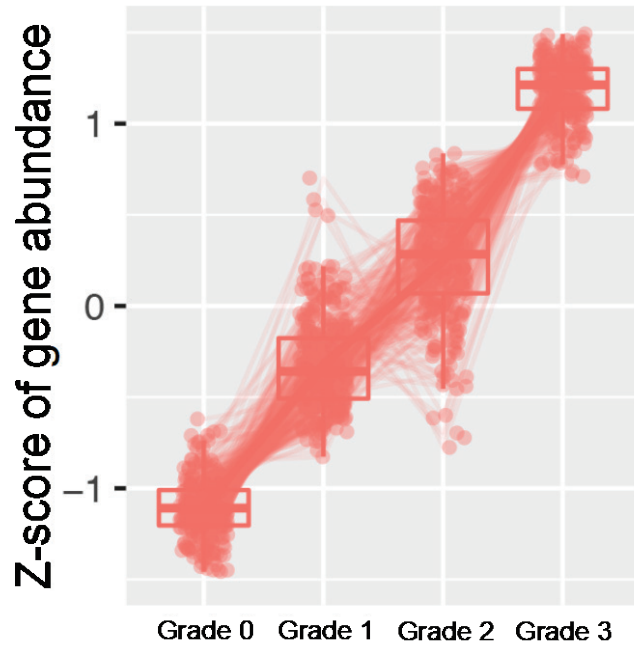

**Supplementary Figure 4. Pattern of increased expression correlating with rejection grade for a cluster of 273 genes, differentially expressed across rejection grades.**

The x-axis represents the Banff rejection grades [Grade 0 (n = 10); Grade 1 (n = 6); Grade 2 (n = 8); Grade 3 (n = 11)] and the y-axis, the centered and scaled expression for the genes (equivalent to z-score). The complete list of 273 genes is shown in Supplementary Table 8.

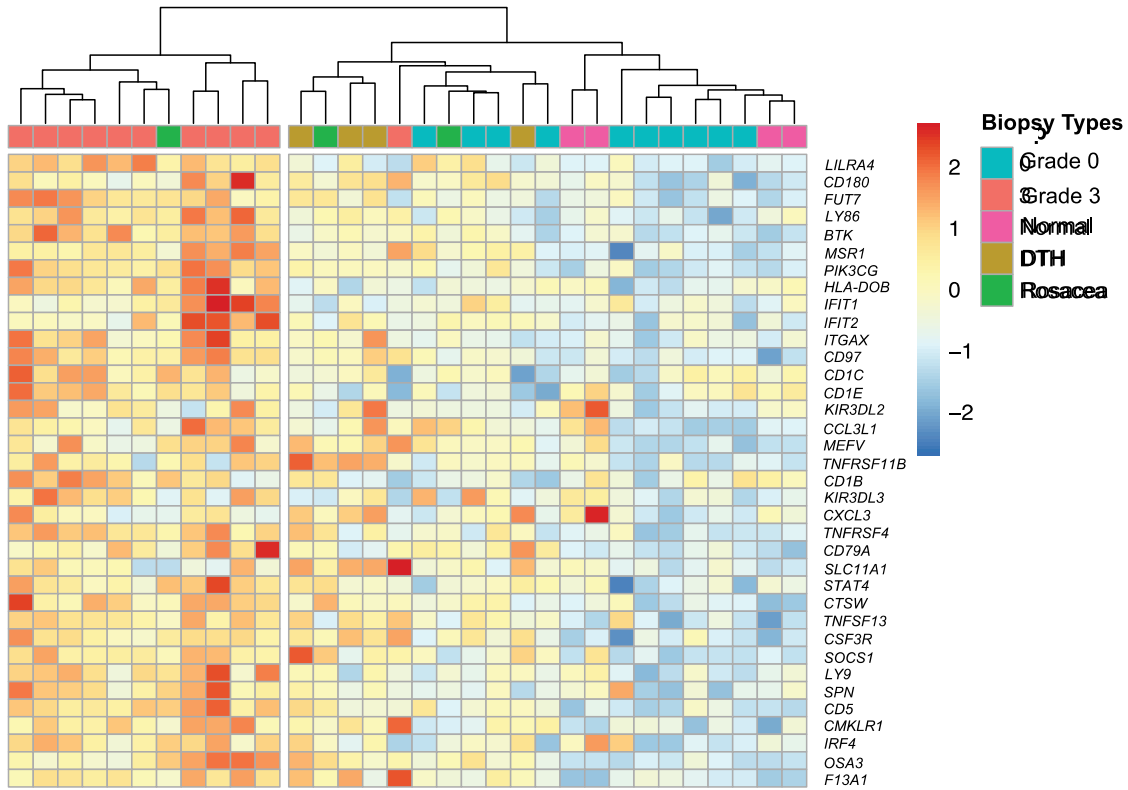

**Supplementary Figure 5. Heatmap of normalized expression values for thirty-six genes upregulated in face transplant rejection that have not been reported in solid organ transplant rejection.**

The complete list of the thirty-six genes is detailed in Supplementary Table 13. Each column represents a biopsy sample. Gene expression row scaled. The cell color represents normalized levels from high (red) to middle (yellow) to low (blue). The degree of relatedness is represented by the dendrogram at the top of the panel (unsupervised hierarchical clustering). All except one biopsy collected from non-transplanted patients with rosacea clustered separately from rejection (Banff Grade 3) samples.

**Supplementary Table 1. Donor and recipient characteristics.**

| Recipient characteristic                  | Patient 1                               | Patient 2                               | Patient 3                               | Patient 4                                                                | Patient 5                               | Patient 6                                                | Patient 7                               |
|-------------------------------------------|-----------------------------------------|-----------------------------------------|-----------------------------------------|--------------------------------------------------------------------------|-----------------------------------------|----------------------------------------------------------|-----------------------------------------|
| <b>Age at transplant (years)</b>          | 57                                      | 25                                      | 30                                      | 44                                                                       | 59                                      | 38                                                       | 33                                      |
| <b>Gender</b>                             | Female                                  | Male                                    | Male                                    | Female                                                                   | Male                                    | Male                                                     | Male                                    |
| <b>Mechanism of injury</b>                | Animal bite                             | Electrical burn                         | Electrical burn                         | Chemical burn                                                            | Electrical burn                         | Gunshot                                                  | Gunshot                                 |
| <b>Year of transplant</b>                 | 2011                                    | 2011                                    | 2011                                    | 2013                                                                     | 2009                                    | 2014                                                     | 2014                                    |
| <b>Follow-up (months)</b>                 | 89                                      | 91                                      | 90                                      | 68                                                                       | 114                                     | 55                                                       | 48                                      |
| <b>Facial allograft details</b>           | Full face                               | Full face                               | Full face                               | Full face                                                                | Partial face                            | Partial face                                             | Partial face                            |
| <b>Panel reactive antibodies (%)</b>      | 0                                       | 68                                      | 0                                       | 97                                                                       | 0                                       | 22                                                       | 32                                      |
| <b>Donor specific antibodies</b>          | Negative                                | Negative                                | Negative                                | Positive                                                                 | Negative                                | Negative                                                 | Negative                                |
| <b>HLA mismatch (A, B, C, DR, DQ, DP)</b> | 8                                       | 8                                       | 5                                       | 11                                                                       | 4                                       | 8                                                        | 7                                       |
| <b>CMV status</b>                         | Positive                                | Positive                                | Negative                                | Positive                                                                 | Positive                                | Negative                                                 | Positive                                |
| <b>EBV status</b>                         | Positive                                | Positive                                | Positive                                | Positive                                                                 | Positive                                | Positive                                                 | Positive                                |
| <b>Induction therapy</b>                  | ATG 1.5mg/kg/day x4; high dose steroids | ATG 1.5mg/kg/day x4; high dose steroids | ATG 1.5mg/kg/day x4; high dose steroids | ATG 1.5mg/kg/day x4; MMF 2g/day; tacrolimus 4mg/day; high dose steroids* | ATG 1.5mg/kg/day x3; high dose steroids | ATG 1.5mg/kg/day x2/0.75mg/kg/day x2; high dose steroids | ATG 1.5mg/kg/day x3; high dose steroids |
| <b>Donor characteristics</b>              |                                         |                                         |                                         |                                                                          |                                         |                                                          |                                         |
| <b>Age (years)</b>                        | 42                                      | 48                                      | 31                                      | 56                                                                       | 55                                      | 51                                                       | 23                                      |
| <b>Gender</b>                             | Female                                  | Male                                    | Male                                    | Female                                                                   | Male                                    | Male                                                     | Male                                    |
| <b>CMV status</b>                         | Positive                                | Positive                                | Positive                                | Negative                                                                 | Positive                                | Positive                                                 | Negative                                |
| <b>EBV status</b>                         | Positive                                | Positive                                | Positive                                | Positive                                                                 | Positive                                | Positive                                                 | Positive                                |
| <b>Ischemia time (minutes)</b>            | 120                                     | 240                                     | 120                                     | 180                                                                      | 150                                     | 180                                                      | 90                                      |

\*Patient 4 was highly sensitized and therefore, received additional immunosuppressants alongside the standard induction regimen with rabbit anti-thymocyte globulin (ATG) as previously reported (1). HLA, human leukocyte antigen; MMF, mycophenolate mofetil; CMV, cytomegalovirus; EBV, Epstein-Barr virus.

**Supplementary Table 2. Histological and clinical characteristics of allograft skin biopsy samples included in the analyses of the study.**

| Sample No. | Patient   | Banff Grade | Immunosuppressive regime at time of biopsy  | Treatment of acute rejection                                           |
|------------|-----------|-------------|---------------------------------------------|------------------------------------------------------------------------|
| 1          | Patient 1 | 2           | Tacrolimus, MMF                             | Tacrolimus dose increased                                              |
| 2          | Patient 1 | 1           | Tacrolimus, MMF                             | None                                                                   |
| 3          | Patient 1 | 0           | Tacrolimus, MMF                             | NA                                                                     |
| 4          | Patient 1 | 2           | Tacrolimus, MMF                             | None                                                                   |
| 5          | Patient 2 | 2           | Tacrolimus, MMF                             | Oral glucocorticoids, anti-thymocyte globulin                          |
| 6          | Patient 2 | 0           | Tacrolimus, MMF                             | NA                                                                     |
| 7          | Patient 2 | 2           | Tacrolimus, MMF                             | Oral glucocorticoids                                                   |
| 8          | Patient 3 | 2           | Tacrolimus, MMF, maintenance glucocorticoid | Glucocorticoid pulse <sup>A</sup> , Tacrolimus dose increased          |
| 9          | Patient 3 | 1           | Tacrolimus, MMF, maintenance glucocorticoid | None                                                                   |
| 10         | Patient 3 | 0           | Tacrolimus, MMF                             | NA                                                                     |
| 11         | Patient 3 | 3           | Tacrolimus, MMF                             | Glucocorticoid pulse <sup>A</sup> , Tacrolimus and MMF doses increased |
| 12         | Patient 3 | 3           | Tacrolimus, MMF                             | Glucocorticoid pulse <sup>A</sup>                                      |
| 13         | Patient 3 | 0           | Tacrolimus, MMF                             | NA                                                                     |
| 14         | Patient 4 | 0           | Tacrolimus, MMF, maintenance glucocorticoid | NA                                                                     |
| 15         | Patient 4 | 0           | Tacrolimus, MMF, maintenance glucocorticoid | NA                                                                     |
| 16         | Patient 4 | 1           | Tacrolimus, MMF, maintenance glucocorticoid | None                                                                   |
| 17         | Patient 4 | 0           | Tacrolimus, MMF, maintenance glucocorticoid | NA                                                                     |
| 18         | Patient 4 | 3           | Tacrolimus, MMF, maintenance glucocorticoid | Glucocorticoid pulse <sup>A</sup>                                      |
| 19         | Patient 4 | 3           | Tacrolimus, MMF, maintenance glucocorticoid | Oral glucocorticoids                                                   |
| 20         | Patient 4 | 1           | Tacrolimus, MMF, maintenance glucocorticoid | None                                                                   |
| 21         | Patient 4 | 3           | Tacrolimus, MMF, maintenance glucocorticoid | Oral glucocorticoids                                                   |
| 22         | Patient 4 | 1           | Tacrolimus, MMF, maintenance glucocorticoid | None                                                                   |
| 23         | Patient 4 | 2           | Tacrolimus, MMF, maintenance glucocorticoid | None                                                                   |
| 24         | Patient 5 | 3           | Tacrolimus, MMF                             | Glucocorticoid pulse <sup>A</sup>                                      |
| 25         | Patient 5 | 3           | Tacrolimus, MMF, maintenance glucocorticoid | Glucocorticoid pulse <sup>A</sup>                                      |
| 26         | Patient 5 | 3           | Tacrolimus, MMF, maintenance glucocorticoid | Glucocorticoid pulse <sup>A</sup> , topical tacrolimus                 |
| 27         | Patient 5 | 3           | Tacrolimus, MMF                             | Glucocorticoid pulse <sup>A</sup>                                      |
| 28         | Patient 5 | 0           | Tacrolimus, MMF                             | NA                                                                     |
| 29         | Patient 6 | 3           | Tacrolimus, MMF                             | Glucocorticoid pulse <sup>A</sup>                                      |
| 30         | Patient 6 | 1           | Tacrolimus, MMF                             | None                                                                   |
| 31         | Patient 6 | 2           | Tacrolimus, MMF                             | Glucocorticoid pulse <sup>A</sup>                                      |
| 32         | Patient 6 | 0           | Tacrolimus, MMF                             | NA                                                                     |
| 33         | Patient 6 | 3           | Tacrolimus, MMF                             | Glucocorticoid pulse <sup>A</sup>                                      |
| 34         | Patient 7 | 2           | Tacrolimus, MMF, maintenance glucocorticoid | Glucocorticoid pulse <sup>A</sup>                                      |
| 35         | Patient 7 | 0           | Tacrolimus, MMF                             | NA                                                                     |



<sup>A</sup> Glucocorticoid pulse treatment consisted of 3 days course of intravenous methylprednisolone.

MMF, mycophenolate mofetil; NA, not applicable.

**Supplementary Table 3. List of the 202 significantly differentially expressed genes in Grade 3 biopsies compared to Grade 0 biopsies.**

Differentially expressed genes ( $\log_2$  fold change  $> 1$ ; adjusted p value  $< 0.05$ ) in Grade 3 (n = 11) compared to Grade 0 (n = 10) were evaluated by the Wald test, using the R package DESeq2-v.1.20.0. P values were adjusted using Benjamini-Hochberg procedure.

| Gene Symbol | Log2 Fold Change | Adjusted p value     |
|-------------|------------------|----------------------|
| GZMB        | 3.408399293      | 2.44E <sup>-14</sup> |
| CXCL10      | 3.254782936      | 7.73E <sup>-09</sup> |
| CXCL9       | 3.018622816      | 1.54E <sup>-08</sup> |
| CCL18       | 2.492905496      | 1.02E <sup>-05</sup> |
| IDO1        | 2.345913685      | 4.38E <sup>-09</sup> |
| C1QB        | 2.28873685       | 8.12E <sup>-07</sup> |
| CXCR3       | 2.257045809      | 1.42E <sup>-10</sup> |
| LAG3        | 2.229244219      | 1.24E <sup>-10</sup> |
| CXCL11      | 2.039479683      | 1.21E <sup>-05</sup> |
| IL2RG       | 2.036657811      | 3.61E <sup>-11</sup> |
| XCL2        | 2.027650828      | 5.73E <sup>-08</sup> |
| FCGR3A      | 2.024118189      | 6.86E <sup>-08</sup> |
| ISG15       | 2.022203685      | 2.99E <sup>-06</sup> |
| CLEC4C      | 2.005658346      | 2.42E <sup>-05</sup> |
| IRF8        | 1.995988235      | 7.12E <sup>-10</sup> |
| HLA-DRA     | 1.969404649      | 2.23E <sup>-11</sup> |
| CD3D        | 1.938555344      | 2.29E <sup>-10</sup> |
| CTSS        | 1.894946302      | 4.84E <sup>-12</sup> |
| LTB         | 1.889930162      | 3.61E <sup>-05</sup> |
| GZMK        | 1.889537791      | 2.71E <sup>-08</sup> |
| CD2         | 1.885599484      | 4.01E <sup>-08</sup> |
| CD8A        | 1.884316831      | 2.71E <sup>-08</sup> |
| GNLY        | 1.882614297      | 4.46E <sup>-05</sup> |
| C1QA        | 1.861448083      | 1.09E <sup>-07</sup> |
| CD163       | 1.857206159      | 2.17E <sup>-06</sup> |
| CD53        | 1.829408761      | 1.01E <sup>-11</sup> |
| PTPRC       | 1.823290478      | 9.13E <sup>-13</sup> |
| CCR1        | 1.817694789      | 5.10E <sup>-07</sup> |
| CCL4        | 1.799557075      | 2.11E <sup>-06</sup> |
| HLA-DPB1    | 1.794999976      | 3.70E <sup>-14</sup> |
| SELPLG      | 1.793854415      | 9.01E <sup>-16</sup> |
| TNFRSF4     | 1.790937255      | 1.58E <sup>-06</sup> |
| CTLA4       | 1.78880823       | 5.18E <sup>-06</sup> |
| SH2D1A      | 1.775909849      | 3.83E <sup>-09</sup> |
| PRF1        | 1.771469169      | 9.88E <sup>-09</sup> |
| CD3G        | 1.763318844      | 4.01E <sup>-08</sup> |
| HLA-DOB     | 1.752992601      | 1.96E <sup>-08</sup> |
| GZMA        | 1.750937452      | 2.09E <sup>-08</sup> |
| HLA-DPA1    | 1.749449127      | 1.01E <sup>-11</sup> |
| CCL5        | 1.742809019      | 4.08E <sup>-07</sup> |
| LY86        | 1.728837002      | 7.25E <sup>-10</sup> |
| TNFSF13B    | 1.722516488      | 6.33E <sup>-08</sup> |
| CYBB        | 1.717387747      | 3.12E <sup>-08</sup> |
| LAMP3       | 1.716565652      | 5.24E <sup>-06</sup> |
| CD27        | 1.71537078       | 1.86E <sup>-07</sup> |
| STAT1       | 1.714005729      | 2.82E <sup>-07</sup> |
| FCGR2A      | 1.698741423      | 1.09E <sup>-09</sup> |
| LCP1        | 1.689301726      | 5.24E <sup>-11</sup> |
| CD80        | 1.686424973      | 7.56E <sup>-04</sup> |

|          |             |                      |
|----------|-------------|----------------------|
| CCR5     | 1.68192851  | 1.98E <sup>-05</sup> |
| CD48     | 1.679219002 | 1.69E <sup>-07</sup> |
| CR1      | 1.675121323 | 6.60E <sup>-05</sup> |
| HLA-DQA1 | 1.673744106 | 1.31E <sup>-02</sup> |
| CD83     | 1.670818169 | 4.77E <sup>-07</sup> |
| CXCR6    | 1.668507932 | 1.75E <sup>-06</sup> |
| FCER1G   | 1.662460795 | 1.89E <sup>-09</sup> |
| IL21R    | 1.66218193  | 3.24E <sup>-06</sup> |
| ITGB2    | 1.660191473 | 6.22E <sup>-10</sup> |
| IL2RA    | 1.659106244 | 1.19E <sup>-05</sup> |
| MRC1     | 1.651088087 | 1.01E <sup>-07</sup> |
| KLRK1    | 1.646248207 | 1.01E <sup>-07</sup> |
| CD247    | 1.63887623  | 2.31E <sup>-07</sup> |
| ITGAX    | 1.627537174 | 1.27E <sup>-06</sup> |
| C3AR1    | 1.620167907 | 1.01E <sup>-07</sup> |
| TNFRSF9  | 1.617281196 | 8.84E <sup>-06</sup> |
| CD4      | 1.610947153 | 7.85E <sup>-13</sup> |
| CLECTA   | 1.603891284 | 9.56E <sup>-08</sup> |
| CCR4     | 1.596704791 | 6.60E <sup>-05</sup> |
| TLR8     | 1.592851237 | 2.71E <sup>-08</sup> |
| CD209    | 1.580960996 | 1.12E <sup>-05</sup> |
| BST2     | 1.576819838 | 2.05E <sup>-07</sup> |
| IL7R     | 1.565475358 | 4.23E <sup>-05</sup> |
| IFIT2    | 1.564689645 | 4.48E <sup>-05</sup> |
| HLA-DMB  | 1.564191477 | 1.96E <sup>-08</sup> |
| TIGIT    | 1.563162051 | 3.64E <sup>-06</sup> |
| FUT7     | 1.557799451 | 3.42E <sup>-05</sup> |
| LILRB1   | 1.553953951 | 5.86E <sup>-05</sup> |
| MARCO    | 1.553703623 | 5.31E <sup>-04</sup> |
| OAS3     | 1.546994494 | 8.30E <sup>-06</sup> |
| HLA-DQB1 | 1.542804204 | 1.76E <sup>-02</sup> |
| C2       | 1.542693492 | 4.30E <sup>-06</sup> |
| IFI27    | 1.525854402 | 6.88E <sup>-05</sup> |
| SIGLEC1  | 1.523424602 | 1.24E <sup>-05</sup> |
| CD1B     | 1.522087168 | 5.4E <sup>-03</sup>  |
| CD3E     | 1.514546888 | 1.00E <sup>-06</sup> |
| SELL     | 1.496460311 | 2.22E <sup>-05</sup> |
| LY9      | 1.492315019 | 1.53E <sup>-07</sup> |
| CCR2     | 1.488987159 | 1.94E <sup>-06</sup> |
| TARP     | 1.483563718 | 1.69E <sup>-05</sup> |
| CTSW     | 1.482246845 | 7.47E <sup>-06</sup> |
| F13A1    | 1.472671683 | 9.84E <sup>-07</sup> |
| CD96     | 1.471749044 | 4.35E <sup>-07</sup> |
| CCL13    | 1.464536682 | 7.67E <sup>-04</sup> |
| MX1      | 1.46074994  | 0.000953455          |
| CCL19    | 1.458698343 | 0.000602318          |
| ITGAL    | 1.450189741 | 2.51E <sup>-05</sup> |
| CD38     | 1.449036275 | 0.00027041           |
| FCGR2B   | 1.443028258 | 1.42E <sup>-10</sup> |
| LY96     | 1.440162539 | 3.23E <sup>-08</sup> |
| CFB      | 1.436060987 | 4.58E <sup>-06</sup> |
| IFITM1   | 1.433847803 | 1.27E <sup>-06</sup> |
| HAVCR2   | 1.429854578 | 3.16E <sup>-10</sup> |
| ICOS     | 1.424698348 | 0.000513781          |
| LCK      | 1.423323638 | 7.89E <sup>-08</sup> |
| CD28     | 1.422732251 | 1.01E <sup>-05</sup> |
| GZMH     | 1.42243173  | 2.22E <sup>-05</sup> |
| CCL3L1   | 1.418558965 | 0.004708418          |
| LTF      | 1.41457572  | 0.005932137          |
| IL10RA   | 1.408137054 | 1.01E <sup>-11</sup> |
| CCR7     | 1.407974758 | 0.00196475           |
| VCAM1    | 1.400957189 | 6.67E <sup>-07</sup> |
| FOXP3    | 1.386625115 | 0.000365591          |
| CD68     | 1.38359601  | 4.72E <sup>-07</sup> |
| CD5      | 1.383126435 | 1.27E <sup>-06</sup> |
| KLRC2    | 1.382087803 | 0.000825181          |

|          |             |                      |
|----------|-------------|----------------------|
| HLA-G    | 1.378184589 | 7.47E <sup>-06</sup> |
| CD74     | 1.369125345 | 2.84E <sup>-06</sup> |
| SELE     | 1.358885964 | 0.00316245           |
| CX3CR1   | 1.348772914 | 1.75E <sup>-05</sup> |
| PDCD1    | 1.342678056 | 0.000779329          |
| CD79A    | 1.339049379 | 0.00295576           |
| IRF1     | 1.32916762  | 1.75E <sup>-05</sup> |
| INPP5D   | 1.326791502 | 1.42E <sup>-10</sup> |
| C3       | 1.319632594 | 2.61E <sup>-05</sup> |
| HLA-DMA  | 1.312347193 | 3.88E <sup>-06</sup> |
| CHIT1    | 1.307736078 | 0.022457808          |
| LILRA4   | 1.307366465 | 0.008905254          |
| CD86     | 1.306149567 | 0.0002268            |
| MSR1     | 1.295051071 | 1.19E <sup>-05</sup> |
| IL12RB1  | 1.28710024  | 0.000325291          |
| IRF7     | 1.279719469 | 0.0002268            |
| PDCD1LG2 | 1.27704318  | 3.65E <sup>-06</sup> |
| CXCL1    | 1.271792987 | 0.00884873           |
| SOCS1    | 1.263138008 | 5.02E <sup>-05</sup> |
| CD274    | 1.257136507 | 0.000786564          |
| PIK3CG   | 1.252822308 | 3.71E <sup>-06</sup> |
| BTLA     | 1.241711508 | 0.000868284          |
| LAIR2    | 1.241691117 | 0.000872268          |
| AMICA1   | 1.237415871 | 8.14E <sup>-07</sup> |
| CSF2     | 1.235232215 | 0.012196226          |
| TNFSF14  | 1.233606776 | 5.77E <sup>-05</sup> |
| LTA      | 1.229292537 | 0.001841094          |
| JAK3     | 1.219381406 | 0.000584673          |
| ITGA4    | 1.202602679 | 1.86E <sup>-05</sup> |
| ICAM1    | 1.196994857 | 8.93E <sup>-06</sup> |
| CD84     | 1.19436403  | 1.00E <sup>-08</sup> |
| CD6      | 1.178264638 | 0.000308299          |
| CMKLR1   | 1.176747021 | 1.63E <sup>-06</sup> |
| LILRB3   | 1.175980408 | 0.00249483           |
| CD180    | 1.174706382 | 0.005932137          |
| HLA-DRB3 | 1.17242994  | 0.001982257          |
| ITK      | 1.1723483   | 0.000500812          |
| CD1E     | 1.168435387 | 0.017040854          |
| TNF      | 1.166604013 | 0.000584673          |
| HCK      | 1.161271846 | 2.68E <sup>-05</sup> |
| CCL8     | 1.158072287 | 0.005584385          |
| CD37     | 1.157267712 | 0.00295576           |
| ITGAM    | 1.152076995 | 2.05E <sup>-06</sup> |
| MICB     | 1.150563386 | 1.19E <sup>-05</sup> |
| CFP      | 1.144262312 | 6.51E <sup>-05</sup> |
| STAT4    | 1.144100101 | 0.000333008          |
| KIR2DL3  | 1.143001731 | 0.006297416          |
| CD97     | 1.142879019 | 1.96E <sup>-08</sup> |
| TAP1     | 1.142052487 | 4.94E <sup>-06</sup> |
| PSMB10   | 1.140090572 | 1.19E <sup>-05</sup> |
| IFIT1    | 1.132404496 | 0.007676868          |
| MEFV     | 1.131552017 | 0.003799779          |
| CSF3R    | 1.130203545 | 6.02E <sup>-05</sup> |
| ZAP70    | 1.126096852 | 0.000175359          |
| PSMB9    | 1.118659707 | 4.48E <sup>-05</sup> |
| TNFRSF1B | 1.118003216 | 2.69E <sup>-07</sup> |
| SPN      | 1.110504202 | 0.000580813          |
| KLRD1    | 1.10995538  | 0.001220199          |
| SLC11A1  | 1.109150197 | 0.003515892          |
| CLEC5A   | 1.104395359 | 0.000756391          |
| CD40     | 1.103274453 | 4.80E <sup>-07</sup> |
| GZMM     | 1.102053892 | 0.003994252          |
| IFIH1    | 1.096466865 | 0.000108958          |
| HLA-B    | 1.093918753 | 5.47E <sup>-07</sup> |
| CD1C     | 1.093425001 | 0.01278048           |
| XCR1     | 1.092025771 | 0.000858944          |

|                  |             |                      |
|------------------|-------------|----------------------|
| <i>BTK</i>       | 1.088264529 | 1.08E <sup>-05</sup> |
| <i>CXCL2</i>     | 1.086420393 | 0.040542955          |
| <i>ISG20</i>     | 1.084887314 | 0.001771997          |
| <i>IL2RB</i>     | 1.076363405 | 0.000175639          |
| <i>CD8B</i>      | 1.076170759 | 0.001346439          |
| <i>CD14</i>      | 1.068924112 | 0.001763805          |
| <i>NCF4</i>      | 1.062393035 | 6.02E <sup>-05</sup> |
| <i>CCL22</i>     | 1.060626053 | 0.022042894          |
| <i>CXCL3</i>     | 1.058356047 | 0.034564049          |
| <i>KIR3DL2</i>   | 1.054927913 | 0.046551827          |
| <i>TNFRSF11B</i> | 1.054912213 | 0.011076697          |
| <i>TAP2</i>      | 1.041351946 | 5.61E <sup>-05</sup> |
| <i>LYN</i>       | 1.041200598 | 0.00013837           |
| <i>PIK3CD</i>    | 1.039168077 | 1.31E <sup>-05</sup> |
| <i>CD33</i>      | 1.036837165 | 0.000108958          |
| <i>IRF4</i>      | 1.034578728 | 0.001441221          |
| <i>TNFRSF17</i>  | 1.025477513 | 0.042732214          |
| <i>HLA-C</i>     | 1.014680298 | 2.68E <sup>-05</sup> |
| <i>KLRB1</i>     | 1.01282837  | 0.00128477           |
| <i>PSMB8</i>     | 1.007799043 | 1.43E <sup>-06</sup> |
| <i>TNFSF13</i>   | 1.007161918 | 6.26E <sup>-03</sup> |

#### Supplementary Table 4. Ingenuity canonical pathways.

Top 25 Ingenuity canonical pathways overrepresented by the 202 differentially expressed genes in Grade 3 biopsies (n = 11), compared to Grade 0 (n = 10).

| Ingenuity Canonical Pathways                               | $-\log(p\text{-value})^A$ | DEG/Genes Ratio <sup>B</sup> |
|------------------------------------------------------------|---------------------------|------------------------------|
| iCOS-iCOSL Signalling in T Helper Cells                    | 5.79                      | 0.587                        |
| Th1 Pathway                                                | 5.6                       | 0.5                          |
| Allograft Rejection Signalling                             | 5.59                      | 0.667                        |
| CTLA4 Signalling in Cytotoxic T Lymphocytes                | 5.36                      | 0.708                        |
| Antigen Presentation Pathway                               | 5.36                      | 0.708                        |
| Calcium-induced T Lymphocyte Apoptosis                     | 5.26                      | 0.75                         |
| Nur77 Signalling in T Lymphocytes                          | 5.26                      | 0.75                         |
| Th1 and Th2 Activation Pathway                             | 4.98                      | 0.45                         |
| B Cell Development                                         | 4.78                      | 0.737                        |
| Autoimmune Thyroid Disease Signalling                      | 4.54                      | 0.667                        |
| Th2 Pathway                                                | 4.31                      | 0.467                        |
| Cdc42 Signalling                                           | 4.26                      | 0.594                        |
| Graft-versus-Host Disease Signalling                       | 3.91                      | 0.615                        |
| Pathogenesis of Multiple Sclerosis                         | 3.85                      | 0.889                        |
| Primary Immunodeficiency Signalling                        | 3.63                      | 0.593                        |
| OX40 Signalling Pathway                                    | 3.54                      | 0.543                        |
| Role of NFAT in Regulation of the Immune Response          | 3.37                      | 0.466                        |
| CD28 Signalling in T Helper Cells                          | 2.83                      | 0.46                         |
| Crosstalk between Dendritic Cells and Natural Killer Cells | 2.54                      | 0.431                        |
| T Helper Cell Differentiation                              | 2.42                      | 0.429                        |
| Super pathway of Inositol phosphate compounds              | 2.38                      | 0.588                        |
| Communication between Innate and adaptive immune cells     | 2.3                       | 0.417                        |
| Natural killer cell signalling                             | 2.21                      | 0.471                        |
| Type I diabetes mellitus signalling                        | 2.09                      | 0.4                          |
| Cytotoxic T lymphocyte-mediated apoptosis of target cells  | 2.01                      | 0.562                        |

<sup>A</sup>Benjamini-Hochberg corrected Fischer's exact test p values are shown.

<sup>B</sup>Ratio of the differentially expressed genes (DEG) that mapped to the pathway divided by the total number of genes that mapped to the canonical pathway.

**Supplementary Table 5. Gene ontology biological process terms.**

Top 20 Gene Ontology (GO) biological process terms enriched among the 202 differentially expressed genes in Grade 3 biopsies (n = 11), compared to Grade 0 (n = 10). Fisher's one-tailed test was used and p values were adjusted using Benjamini-Hochberg False Discovery Rate for multiple testing correction.

| GO Biological Processes                                                                   | GO ID      | Benjamini's adjusted p-value |
|-------------------------------------------------------------------------------------------|------------|------------------------------|
| Lymphocyte co-stimulation                                                                 | GO:0031294 | 2.26E <sup>-05</sup>         |
| T cell co-stimulation                                                                     | GO:0031295 | 2.26E <sup>-05</sup>         |
| Immune system process                                                                     | GO:0022376 | 2.75E <sup>-05</sup>         |
| Leukocyte activation                                                                      | GO:0045321 | 2.75E <sup>-05</sup>         |
| Antigen processing and presentation of exogenous antigen                                  | GO:0019884 | 6.02E <sup>-05</sup>         |
| Antigen processing and presentation                                                       | GO:0019882 | 9.42E <sup>-05</sup>         |
| T cell activation                                                                         | GO:0042110 | 9.42E <sup>-05</sup>         |
| Antigen processing and presentation of peptide antigen                                    | GO:0048002 | 1.21E <sup>-04</sup>         |
| Cell activation                                                                           | GO:0001775 | 1.31E <sup>-04</sup>         |
| Antigen processing and presentation of exogenous peptide antigen                          | GO:0002478 | 1.48E <sup>-04</sup>         |
| Immune response                                                                           | GO:0006955 | 1.48E <sup>-04</sup>         |
| Lymphocyte activation                                                                     | GO:0046649 | 1.50E <sup>-04</sup>         |
| Antigen processing and presentation of exogenous peptide antigen via MHC class II         | GO:0019886 | 1.56E <sup>-04</sup>         |
| Leukocyte cell-cell adhesion                                                              | GO:0007159 | 1.51E <sup>-03</sup>         |
| Antigen processing and presentation of peptide antigen via MHC class II                   | GO:0002495 | 1.84E <sup>-03</sup>         |
| Antigen processing and presentation of peptide or polysaccharide antigen via MHC class II | GO:0002504 | 4.73E <sup>-03</sup>         |
| Regulation of lymphocyte activation                                                       | GO:0051249 | 5.03E <sup>-03</sup>         |
| Regulation of immune system process                                                       | GO:0002682 | 6.94E <sup>-03</sup>         |
| Regulation of T cell activation                                                           | GO:0050863 | 8.42E <sup>-03</sup>         |
| Positive regulation of lymphocyte activation                                              | GO:0051251 | 8.68E <sup>-03</sup>         |

### Supplementary Table 6. Upstream regulators.

The upstream regulators of the 202 differentially expressed genes in Grade 3 biopsies (n = 11), compared to Grade 0 (n = 10).

| Cytokine Upstream Regulator | Z-score <sup>A</sup> | P-value of overlap <sup>B</sup> |
|-----------------------------|----------------------|---------------------------------|
| IFN $\gamma$                | 8.416                | 4.82E <sup>-06</sup>            |
| TNF                         | 7.701                | 3.43E <sup>-03</sup>            |
| IL2                         | 6.52                 | 3.53E <sup>-05</sup>            |
| CSF2                        | 6.494                | 7.48E <sup>-03</sup>            |
| IL18                        | 4.815                | 1.95E <sup>-03</sup>            |

<sup>A</sup>Z-score accounts for both the total number of genes differentially expressed and direction of activation; a z-score  $\geq 2$  (activated) or  $\leq -2$  (inhibited) was considered significant.

<sup>B</sup>P-value of overlap represents the significance in the overlap between the identified differentially expressed genes (the known downstream targets) and all genes associated with a particular upstream regulator in the Ingenuity database.



**Supplementary Table 7. List of the 153 differentially expressed genes in Grade 2 biopsies compared to Grade 0.**

Differentially expressed genes (log2 fold change > 1; adjusted p value < 0.05) in Grade 2 biopsies (n = 8) compared to Grade 0 biopsies (n = 10) were evaluated using normalized gene expression counts as input and the Wald significance test. P values were adjusted using Benjamini-Hochberg procedure.

| Gene Symbol | Log2 Fold Change | Adjusted p value     |
|-------------|------------------|----------------------|
| FOS         | 2.455652707      | 7.71E <sup>-04</sup> |
| CXCL9       | 2.209491481      | 7.71E <sup>-04</sup> |
| CT45A1      | 2.157359485      | 1.63E <sup>-03</sup> |
| CXCL2       | 2.102018385      | 6.36E <sup>-04</sup> |
| GZMB        | 1.90580579       | 6.36E <sup>-04</sup> |
| MARCO       | 1.884154274      | 6.36E <sup>-04</sup> |
| CXCL3       | 1.812645106      | 1.45E <sup>-03</sup> |
| LILRB3      | 1.811202713      | 1.84E <sup>-04</sup> |
| IFNB1       | 1.785339862      | 5.98E <sup>-03</sup> |
| ICAM4       | 1.766102906      | 2.37E <sup>-03</sup> |
| C1QB        | 1.718422306      | 2.35E <sup>-03</sup> |
| CD79A       | 1.710451026      | 1.48E <sup>-03</sup> |
| LAIR2       | 1.681420935      | 3.94E <sup>-04</sup> |
| GAGE1       | 1.664517231      | 1.04E <sup>-02</sup> |
| IL1RAPL2    | 1.66321669       | 1.50E <sup>-03</sup> |
| FCGR3A      | 1.66057526       | 6.18E <sup>-04</sup> |
| MS4A1       | 1.649967192      | 1.04E <sup>-02</sup> |
| CD22        | 1.631539768      | 2.03E <sup>-03</sup> |
| CD80        | 1.626937579      | 5.61E <sup>-03</sup> |
| POU2AF1     | 1.626183328      | 5.66E <sup>-03</sup> |
| CXCL10      | 1.621822078      | 1.39E <sup>-02</sup> |
| LILRB1      | 1.620578114      | 7.71E <sup>-04</sup> |
| CCL18       | 1.605107499      | 1.49E <sup>-02</sup> |
| TNFRSF17    | 1.601512981      | 4.17E <sup>-03</sup> |
| IL17F       | 1.598183772      | 1.23E <sup>-02</sup> |
| SSX1        | 1.591600596      | 1.02E <sup>-02</sup> |
| CXCL1       | 1.591064335      | 4.3E <sup>-03</sup>  |
| MAGEC1      | 1.590939324      | 8.79E <sup>-03</sup> |
| CD180       | 1.563168965      | 1.91E <sup>-03</sup> |
| KIR3DL2     | 1.560513282      | 6.59E <sup>-03</sup> |
| SPO11       | 1.558902886      | 1.02E <sup>-02</sup> |
| ULBP2       | 1.558023389      | 4.66E <sup>-03</sup> |
| CXCL5       | 1.545228313      | 6.57E <sup>-03</sup> |
| CR1         | 1.542697541      | 2.37E <sup>-03</sup> |
| IL2RA       | 1.532446671      | 1.12E <sup>-03</sup> |
| IL5         | 1.529129187      | 1.58E <sup>-02</sup> |
| CYBB        | 1.526998136      | 1.84E <sup>-04</sup> |
| LILRA4      | 1.526535338      | 6.9E <sup>-03</sup>  |
| CD19        | 1.500245448      | 2.37E <sup>-03</sup> |
| CCR1        | 1.496546371      | 8.89E <sup>-04</sup> |
| IFNA1       | 1.491409698      | 2.72E <sup>-02</sup> |
| CLEC4C      | 1.490920047      | 8.2E <sup>-03</sup>  |
| PRM1        | 1.489332107      | 1.43E <sup>-02</sup> |
| CEACAM6     | 1.488984116      | 8.49E <sup>-03</sup> |
| FUT5        | 1.477350316      | 1.56E <sup>-02</sup> |

|           |             |                      |
|-----------|-------------|----------------------|
| IL27      | 1.473025646 | 1.24E <sup>-02</sup> |
| CD8A      | 1.468830529 | 6.36E <sup>-04</sup> |
| LILRA5    | 1.466766573 | 5.88E <sup>-03</sup> |
| CD163     | 1.466725971 | 2.32E <sup>-03</sup> |
| CCR9      | 1.465666559 | 2.55E <sup>-02</sup> |
| TNFSF18   | 1.460105613 | 1.98E <sup>-02</sup> |
| KLRC2     | 1.438121863 | 3.3E <sup>-03</sup>  |
| MEFV      | 1.431754279 | 1.91E <sup>-03</sup> |
| IFNA7     | 1.423307163 | 2.46E <sup>-02</sup> |
| IDO1      | 1.406481241 | 3.6E <sup>-03</sup>  |
| CD209     | 1.403930476 | 1.58E <sup>-03</sup> |
| CCR3      | 1.403135774 | 2.24E <sup>-02</sup> |
| LTB       | 1.401097331 | 1E <sup>-02</sup>    |
| TNFRSF11B | 1.399140579 | 3.36E <sup>-03</sup> |
| SSX4      | 1.394206267 | 3.1E <sup>-02</sup>  |
| CSF3      | 1.388628186 | 1.04E <sup>-02</sup> |
| CD38      | 1.388360374 | 3.39E <sup>-03</sup> |
| FCER1G    | 1.385139695 | 1.84E <sup>-04</sup> |
| C9        | 1.382969686 | 1.5E <sup>-02</sup>  |
| TLR8      | 1.382075206 | 1.84E <sup>-04</sup> |
| C3AR1     | 1.380628137 | 4.49E <sup>-04</sup> |
| CXCR3     | 1.379340333 | 1.63E <sup>-03</sup> |
| IL12RB1   | 1.367922752 | 1.63E <sup>-03</sup> |
| CCL15     | 1.363102103 | 2.81E <sup>-02</sup> |
| SLC11A1   | 1.359217792 | 2.37E <sup>-03</sup> |
| CCL19     | 1.354572483 | 6.59E <sup>-03</sup> |
| CCL4      | 1.34801205  | 3.38E <sup>-03</sup> |
| SELL      | 1.346057762 | 1.91E <sup>-03</sup> |
| MAGEA12   | 1.345155145 | 2.83E <sup>-02</sup> |
| CCL26     | 1.334470142 | 1.39E <sup>-02</sup> |
| CASP10    | 1.321114673 | 1.29E <sup>-02</sup> |
| SIGLEC1   | 1.320849018 | 2.03E <sup>-03</sup> |
| CCL1      | 1.320438647 | 3.55E <sup>-02</sup> |
| IL2       | 1.317105257 | 3.31E <sup>-02</sup> |
| C1QA      | 1.316340113 | 2.32E <sup>-03</sup> |
| CCR5      | 1.304702801 | 5.88E <sup>-03</sup> |
| CXCR1     | 1.300698461 | 2.25E <sup>-02</sup> |
| CR2       | 1.299775085 | 1.48E <sup>-02</sup> |
| MAGEA1    | 1.298780615 | 3.55E <sup>-02</sup> |
| IFNL2     | 1.298016765 | 3.59E <sup>-02</sup> |
| LY86      | 1.29698285  | 3.94E <sup>-04</sup> |
| CCR7      | 1.295105034 | 1.39E <sup>-02</sup> |
| CXCL11    | 1.290066485 | 1.95E <sup>-02</sup> |
| FCGR1A    | 1.280094986 | 8.2E <sup>-03</sup>  |
| IL21R     | 1.279215804 | 3.3E <sup>-03</sup>  |
| PAX5      | 1.271600078 | 1.35E <sup>-02</sup> |
| PDCD1     | 1.26752442  | 6.7E <sup>-03</sup>  |
| XCL2      | 1.267522086 | 5.12E <sup>-03</sup> |
| CLEC7A    | 1.261274383 | 8.28E <sup>-04</sup> |
| STAT4     | 1.24688113  | 1.45E <sup>-03</sup> |
| ITGAX     | 1.24657862  | 2.37E <sup>-03</sup> |
| C2        | 1.243272902 | 2.37E <sup>-03</sup> |
| IFNA2     | 1.242444272 | 2.96E <sup>-02</sup> |
| FPR2      | 1.231563626 | 1.95E <sup>-02</sup> |
| FUT7      | 1.218619614 | 6.59E <sup>-03</sup> |
| CCR4      | 1.218142222 | 1.09E <sup>-02</sup> |
| FCGR2A    | 1.209587947 | 6.36E <sup>-04</sup> |
| CD2       | 1.208090111 | 3.95E <sup>-03</sup> |
| ISG15     | 1.204792378 | 1.95E <sup>-02</sup> |
| IL7R      | 1.195957062 | 8.81E <sup>-03</sup> |
| AMBP      | 1.191951549 | 2.7E <sup>-02</sup>  |
| LILRB2    | 1.188870695 | 2.37E <sup>-03</sup> |
| TNFSF13   | 1.182566855 | 5.67E <sup>-03</sup> |
| CD28      | 1.17434713  | 2.76E <sup>-03</sup> |
| ATG12     | 1.167495823 | 1.24E <sup>-02</sup> |

|          |              |                      |
|----------|--------------|----------------------|
| CD8B     | 1.167180913  | 3.37E <sup>-03</sup> |
| KLRF1    | 1.162898923  | 1.59E <sup>-02</sup> |
| CD48     | 1.160687732  | 3.16E <sup>-03</sup> |
| CD68     | 1.150476142  | 8.27E <sup>-04</sup> |
| CXCR6    | 1.143874367  | 6.57E <sup>-03</sup> |
| LAG3     | 1.14311045   | 6.44E <sup>-03</sup> |
| CCL3     | 1.139613232  | 3.09E <sup>-02</sup> |
| KLRC1    | 1.136957846  | 7.68E <sup>-03</sup> |
| BLK      | 1.13400885   | 2.49E <sup>-02</sup> |
| CD53     | 1.130768599  | 8.28E <sup>-04</sup> |
| CD37     | 1.128433334  | 1.24E <sup>-02</sup> |
| LTA      | 1.12791676   | 1.39E <sup>-02</sup> |
| MSR1     | 1.127121404  | 2.02E <sup>-03</sup> |
| CTSW     | 1.123315139  | 5.12E <sup>-03</sup> |
| MRC1     | 1.120686873  | 3.16E <sup>-03</sup> |
| THY1     | 1.116328967  | 1.58E <sup>-02</sup> |
| HLA-DRB3 | 1.107855802  | 1.24E <sup>-02</sup> |
| CTSS     | 1.104773928  | 1.22E <sup>-03</sup> |
| GZMK     | 1.104413632  | 6.84E <sup>-03</sup> |
| CD27     | 1.103585969  | 5.67E <sup>-03</sup> |
| CD3D     | 1.097111551  | 3.37E <sup>-03</sup> |
| IRF8     | 1.096880792  | 5.39E <sup>-03</sup> |
| TLR10    | 1.095212797  | 1.52E <sup>-02</sup> |
| ICAM1    | 1.09516621   | 1.12E <sup>-03</sup> |
| CMKLR1   | 1.085314698  | 6.36E <sup>-04</sup> |
| BTLA     | 1.070875022  | 1.45E <sup>-02</sup> |
| TARP     | 1.062855629  | 1.04E <sup>-02</sup> |
| TNFSF13B | 1.059087445  | 5.95E <sup>-03</sup> |
| HLA-DOB  | 1.056175854  | 5.28E <sup>-03</sup> |
| CD79B    | 1.053888767  | 3.33E <sup>-02</sup> |
| ITGB2    | 1.052404892  | 1.63E <sup>-03</sup> |
| C4B      | 1.048068078  | 1.5E <sup>-02</sup>  |
| PRF1     | 1.04770254   | 5.22E <sup>-03</sup> |
| ITGAL    | 1.044826263  | 1.15E <sup>-02</sup> |
| F13A1    | 1.038407237  | 4.53E <sup>-03</sup> |
| KIR2DL3  | 1.033529359  | 3.09E <sup>-02</sup> |
| CFB      | 1.024228759  | 6.59E <sup>-03</sup> |
| HLA-DMA  | 1.022231016  | 3.3E <sup>-03</sup>  |
| SH2D1A   | 1.015544078  | 5.67E <sup>-03</sup> |
| JAK3     | 1.015065255  | 1.49E <sup>-02</sup> |
| CCL23    | 1.009173348  | 3.44E <sup>-02</sup> |
| SLAMF6   | 1.008554831  | 2.26E <sup>-02</sup> |
| FOXJ1    | -1.915769459 | 4.3E <sup>-03</sup>  |

## Supplementary Table 8. Pattern analysis.

The list of 273 genes that progressively over-expressed as the rejection severity increased from Grade 0 through Grade 3 acute cellular rejection according to the pattern analysis. The pattern analysis is detailed in Methods.

| Gene Symbol |        |          |          |          |
|-------------|--------|----------|----------|----------|
| A2M         | CD68   | GZMH     | ISG20    | PTGS2    |
| ADA         | CD7    | GZMK     | ITGA4    | PTPRC    |
| AMICA1      | CD74   | GZMM     | ITGA5    | RELB     |
| ANXA1       | CD80   | HAVCR2   | ITGAL    | RUNX3    |
| BAX         | CD83   | HCK      | ITGAM    | S100B    |
| BCL10       | CD84   | HLA-A    | ITGAX    | SBNO2    |
| BST2        | CD86   | HLA-B    | ITGB2    | SELE     |
| BTK         | CD8A   | HLA-C    | ITK      | SELL     |
| BTLA        | CD8B   | HLA-DMA  | JAK2     | SELPLG   |
| C1QA        | CD96   | HLA-DMB  | JAK3     | SERPING1 |
| C1QB        | CD97   | HLA-DOB  | KIR3DL3  | SH2D1A   |
| C1R         | CFB    | HLA-DPA1 | KIR2DL3  | SIGIRR   |
| C1S         | CFP    | HLA-DPB1 | KLRB1    | SIGLEC1  |
| C2          | CHIT1  | HLA-DQB1 | KLRC2    | SOCS1    |
| C3          | CKLF   | HLA-DRA  | KLRD1    | SPN      |
| C3AR1       | CLEC4C | HLA-DRB3 | KLRK1    | SPP1     |
| CARD11      | CLEC7A | HLA-E    | LAG3     | ST6GAL1  |
| CASP1       | CMA1   | HLA-G    | LAMP3    | STAT1    |
| CASP3       | CMKLR1 | ICAM1    | LCK      | STAT2    |
| CASP8       | CR1    | ICAM2    | LCP1     | STAT4    |
| CCL13       | CSF1R  | ICAM3    | LILRA4   | SYK      |
| CCL18       | CSF2RB | ICOS     | LRP1     | TAP1     |
| CCL19       | CSF3R  | IDO1     | LTA      | TAP2     |
| CCL2        | CTLA4  | IFI16    | LTB      | TAPBP    |
| CCL22       | CTSL   | IFI27    | LY86     | TARP     |
| CCL4        | CTSS   | IFI35    | LY9      | TICAM2   |
| CCL5        | CTSW   | IFIH1    | LY96     | TIGIT    |
| CCL8        | CX3CR1 | IFIT1    | LYN      | TLR1     |
| CCR1        | CXCL10 | IFIT2    | MAP2K1   | TLR2     |
| CCR2        | CXCL11 | IFITM1   | MFGE8    | TLR3     |
| CCR4        | CXCL16 | IFITM2   | MICB     | TLR7     |
| CCR5        | CXCL9  | IFNGR1   | MR1      | TLR8     |
| CCR7        | CXCR3  | IL10RA   | MRC1     | TNF      |
| CD14        | CXCR4  | IL12RB1  | MSR1     | TNFAIP3  |
| CD163       | CXCR6  | IL12RB2  | MX1      | TNFRSF14 |
| CD2         | CYBB   | IL15     | MYD88    | TNFRSF1B |
| CD209       | CYFIP2 | IL15RA   | NCF4     | TNFRSF4  |
| CD244       | CYLD   | IL17RA   | NCR1     | TNFRSF9  |
| CD247       | DDX58  | IL1RL1   | NFATC3   | TNFSF13  |
| CD27        | ELK1   | IL21R    | NLRC5    | TNFSF13B |
| CD274       | ENG    | IL2RA    | OAS3     | TNFSF14  |
| CD28        | ETS1   | IL2RB    | PDCD1    | TNFSF4   |
| CD33        | F13A1  | IL2RG    | PDCD1LG2 | TRAF2    |
| CD37        | FCER1G | IL3RA    | PDGFC    | TYK2     |
| CD38        | FCER2  | IL6R     | PECAM1   | VCAM1    |
| CD3D        | FCGR2A | IL6ST    | PIK3CD   | XCL2     |
| CD3E        | FCGR2B | IL7R     | PIK3CG   | XCR1     |
| CD3G        | FCGR3A | INPP5D   | PIN1     | YTHDF2   |
| CD4         | FLT3   | IRAK1    | PLAU     | ZAP70    |
| CD40        | FLT3LG | IRF1     | ISG21    | CNOT10   |
| CD40LG      | FOXP3  | IRF2     | ITGA6    | NUBP1    |

|             |             |              |              |              |
|-------------|-------------|--------------|--------------|--------------|
| <i>CD48</i> | <i>FUT7</i> | <i>IRF4</i>  | <i>ITGA7</i> | <i>TMUB2</i> |
| <i>CD5</i>  | <i>GNLY</i> | <i>IRF7</i>  | <i>ITGAL</i> | <i>USP39</i> |
| <i>CD53</i> | <i>GZMA</i> | <i>IRF8</i>  | <i>ITGAM</i> |              |
| <i>CD6</i>  | <i>GZMB</i> | <i>ISG15</i> | <i>ITGAX</i> |              |

### Supplementary Table 9. Top 20 Gene Ontology (GO) biological process terms.

Top 20 Gene Ontology (GO) biological process terms enriched among the 273 genes that progressively over-expressed as the rejection severity increased from Grade 0 through Grade 3 acute cellular rejection. The complete list of 273 genes is shown in Supplementary Table 8. P values were obtained using Fisher's one-tailed test and adjusted using Benjamini-Hochberg False Discovery Rate for multiple testing correction.

| GO Biological Processes                                          | GO ID      | Benjamini's adjusted p-value |
|------------------------------------------------------------------|------------|------------------------------|
| T cell costimulation                                             | GO:0031295 | 2.69E <sup>-06</sup>         |
| Lymphocyte costimulation                                         | GO:0031294 | 1.73E <sup>-05</sup>         |
| Immune system process                                            | GO:0002376 | 5.59E <sup>-04</sup>         |
| Positive regulation of leukocyte cell-cell adhesion              | GO:1903039 | 6.43E <sup>-04</sup>         |
| Leukocyte cell-cell adhesion                                     | GO:0007159 | 1.63E <sup>-03</sup>         |
| Positive regulation of T cell activation                         | GO:0050870 | 1.95E <sup>-03</sup>         |
| Positive regulation of cell-cell adhesion                        | GO:0022409 | 2.55E <sup>-03</sup>         |
| Regulation of leukocyte cell-cell adhesion                       | GO:1903037 | 5.42E <sup>-03</sup>         |
| Regulation of T cell activation                                  | GO:0050863 | 6.15E <sup>-03</sup>         |
| Antigen processing and presentation of exogenous peptide antigen | GO:0002478 | 6.15E <sup>-03</sup>         |
| Antigen processing and presentation of peptide antigen           | GO:0048002 | 6.37E <sup>-03</sup>         |
| Immune response                                                  | GO:0006955 | 9.07E <sup>-03</sup>         |
| Positive regulation of lymphocyte activation                     | GO:0051251 | 9.07E <sup>-03</sup>         |
| T cell activation                                                | GO:0042110 | 1.58E <sup>-02</sup>         |
| Positive regulation of cell activation                           | GO:0050867 | 1.58E <sup>-02</sup>         |
| Positive regulation of leukocyte activation                      | GO:0002696 | 1.66E <sup>-02</sup>         |
| Cellular response to type I interferon                           | GO:0071357 | 1.67E <sup>-02</sup>         |
| Type I interferon signalling pathway                             | GO:0060337 | 1.67E <sup>-02</sup>         |
| Cell-cell adhesion                                               | GO:0098609 | 2.13E <sup>-02</sup>         |
| Regulation of lymphocyte activation                              | GO:0051249 | 2.13E <sup>-02</sup>         |

**Supplementary Table 10. List of 107 genes that were exclusively differentially expressed in Grade 3 biopsies.**

List of 107 genes that were exclusively differentially expressed in Grade 3 biopsies (n = 11) but not in Grade 2 (n = 8), when compared to Grade 0 (n = 10).

| <b>Gene Symbol</b> |               |                 |                 |                 |
|--------------------|---------------|-----------------|-----------------|-----------------|
| <i>AMICA1</i>      | <i>CD6</i>    | <i>HLA-B</i>    | <i>ISG20</i>    | <i>PSMB8</i>    |
| <i>BST2</i>        | <i>CD74</i>   | <i>HLA-C</i>    | <i>ITGA4</i>    | <i>PSMB9</i>    |
| <i>BTK</i>         | <i>CD83</i>   | <i>HLA-DMB</i>  | <i>ITGAM</i>    | <i>PTPRC</i>    |
| <i>C3</i>          | <i>CD84</i>   | <i>HLA-DPA1</i> | <i>ITK</i>      | <i>SELE</i>     |
| <i>CCL13</i>       | <i>CD86</i>   | <i>HLA-DPB1</i> | <i>KLRB1</i>    | <i>SELPLG</i>   |
| <i>CCL22</i>       | <i>CD96</i>   | <i>HLA-DQA1</i> | <i>KLRD1</i>    | <i>SOCS1</i>    |
| <i>CCL3L1</i>      | <i>CD97</i>   | <i>HLA-DQB1</i> | <i>KLRK1</i>    | <i>SPN</i>      |
| <i>CCL5</i>        | <i>CFP</i>    | <i>HLA-DRA</i>  | <i>LAMP3</i>    | <i>STAT1</i>    |
| <i>CCL8</i>        | <i>CHIT1</i>  | <i>HLA-G</i>    | <i>LCK</i>      | <i>TAP1</i>     |
| <i>CCR2</i>        | <i>CLEC5A</i> | <i>ICOS</i>     | <i>LCP1</i>     | <i>TAP2</i>     |
| <i>CD14</i>        | <i>CSF2</i>   | <i>IFI27</i>    | <i>LTF</i>      | <i>TIGIT</i>    |
| <i>CD1B</i>        | <i>CSF3R</i>  | <i>IFIH1</i>    | <i>LY9</i>      | <i>TNF</i>      |
| <i>CD1C</i>        | <i>CTLA4</i>  | <i>IFIT1</i>    | <i>LY96</i>     | <i>TNFRSF1B</i> |
| <i>CD1E</i>        | <i>CX3CR1</i> | <i>IFIT2</i>    | <i>LYN</i>      | <i>TNFRSF4</i>  |
| <i>CD247</i>       | <i>FCGR2B</i> | <i>IFITM1</i>   | <i>MICB</i>     | <i>TNFRSF9</i>  |
| <i>CD274</i>       | <i>FOXP3</i>  | <i>IL10RA</i>   | <i>MX1</i>      | <i>TNFSF14</i>  |
| <i>CD33</i>        | <i>GNLY</i>   | <i>IL2RB</i>    | <i>NCF4</i>     | <i>VCAM1</i>    |
| <i>CD3E</i>        | <i>GZMA</i>   | <i>IL2RG</i>    | <i>OAS3</i>     | <i>XCR1</i>     |
| <i>CD3G</i>        | <i>GZMH</i>   | <i>INPP5D</i>   | <i>PDCD1LG2</i> | <i>ZAP70</i>    |
| <i>CD4</i>         | <i>GZMM</i>   | <i>IRF1</i>     | <i>PIK3CD</i>   |                 |
| <i>CD40</i>        | <i>HAVCR2</i> | <i>IRF4</i>     | <i>PIK3CG</i>   |                 |
| <i>CD5</i>         | <i>HCK</i>    | <i>IRF7</i>     | <i>PSMB10</i>   |                 |

## Supplementary Table 11. Literature searches for the scoping review.

Details of the literature searches run and imported to Endnote for the scoping review.

| Database                                                                                                                                     | Search Terms                                                                                                                                                                                                                                                                                                                                                                                                                                                                                                     | Results |
|----------------------------------------------------------------------------------------------------------------------------------------------|------------------------------------------------------------------------------------------------------------------------------------------------------------------------------------------------------------------------------------------------------------------------------------------------------------------------------------------------------------------------------------------------------------------------------------------------------------------------------------------------------------------|---------|
| <b>PubMed</b>                                                                                                                                | ((("Gene Expression"[Mesh] OR (gene[tiab] AND expression[tiab]) OR biomarkers[MeSH] OR biomarker*[tiab] OR (overexpress*[tiab] AND gene*[tiab]) OR molecular marker*[tiab] OR gene*[tiab] OR signature gene*[tiab]) AND ("Organ Transplantation"[Mesh] OR organ transplant*[tiab] OR allotransplantation[tiab] OR allograft*[tiab] OR intragraft[tiab] OR "solid organ transplant"[tiab]) AND ("Graft Rejection"[Mesh])) AND (rejection[ti] OR (gene*[ti] AND expression[ti]) OR allo*[ti])) AND "Humans"[Mesh]) | 2340    |
| <b>Web of Science</b><br>Indexes=SCI-EXPANDED, SSCI, A&HCI, CPCI-S, CPCI-SSH, BKCI-S, BKCI-SSH, ESCI, CCR-EXPANDED, IC<br>Timespan=All years | TS = ("gene expression" OR "biomarker" OR "molecular marker" OR "signature gene" OR "overexpression") AND TS = ("organ transplantation" OR "organ transplant" OR "allotransplantation" OR allograft* OR intragraft* OR "solid organ transplant") AND TS = ("Graft rejection" OR "rejection")                                                                                                                                                                                                                     | 2526    |
| <b>Embase</b>                                                                                                                                | ('gene expression':ti,ab,kw OR 'biological marker':ti,ab,kw OR 'gene overexpression':ti,ab,kw OR 'molecular marker':ti,ab,kw OR 'signature gene':ti,ab,kw) AND ('organ transplantation':ti,ab,kw OR 'allograft':ti,ab,kw OR 'allotransplantation':ti,ab,kw OR 'intragraft':ti,ab,kw OR 'solid organ transplantation':ti,ab,kw OR 'solid organ transplant':ti,ab,kw) AND ('graft rejection':ti,ab,kw OR 'rejection':ti,ab,kw) AND 'human':ti,ab,kw                                                                | 315     |
| <b>Countway Discovery Medicine-EBSCO</b>                                                                                                     | AB ( "gene expression" OR "biomarker" OR "molecular marker" OR "signature gene" OR "overexpression" ) AND AB ( "organ transplantation" OR "organ transplant" OR "allotransplantation" OR allograft* OR intragraft* OR "solid organ transplant" ) AND AB ( "Graft rejection" OR "rejection" )                                                                                                                                                                                                                     | 1124    |



## Supplementary Table 12. Genes shared with solid organ transplant rejection.

166/202 genes upregulated in face transplant severe Grade 3 acute rejection (when compared to non-rejection biopsies) were shared with genes previously reported to be increased in solid organ transplants (kidney, liver, heart) during acute rejection. Details of the 202 differentially expressed genes are listed in Supplementary Table 3. P values were obtained using the Wald test and adjusted using Benjamini-Hochberg procedure.

| Gene Symbol     | Log2 fold change (Grade 0 vs. 3 in face transplants) | Adjusted p value (Grade 0 vs. 3 in face transplants) | Literature in Solid Organ Transplant Studies*                       |
|-----------------|------------------------------------------------------|------------------------------------------------------|---------------------------------------------------------------------|
| <i>GZMB</i>     | 3.408399293                                          | 2.44E <sup>-14</sup>                                 | Kidney(2-11), Heart(12-15), Liver(16, 17)                           |
| <i>CXCL10</i>   | 3.254782936                                          | 7.73E <sup>-09</sup>                                 | Kidney(10, 18, 19), Heart(15, 20), Liver(21)                        |
| <i>CXCL9</i>    | 3.018622816                                          | 1.54E <sup>-08</sup>                                 | Kidney(10, 19), Kidney and Heart(22), Heart(15, 20), Liver(17, 21)  |
| <i>CCL18</i>    | 2.492905496                                          | 1.02E <sup>-05</sup>                                 | Kidney and Heart(22), Heart(14)                                     |
| <i>IDO1</i>     | 2.345913685                                          | 4.38E <sup>-09</sup>                                 | Kidney(19), Heart(15)                                               |
| <i>C1QB</i>     | 2.28873685                                           | 8.12E <sup>-07</sup>                                 | Kidney(23), Heart(15)                                               |
| <i>CXCR3</i>    | 2.257045809                                          | 1.42E <sup>-10</sup>                                 | Heart(20)                                                           |
| <i>LAG3</i>     | 2.229244219                                          | 1.24E <sup>-10</sup>                                 | Kidney(24, 25), Heart(14)                                           |
| <i>CXCL11</i>   | 2.039479683                                          | 1.21E <sup>-05</sup>                                 | Kidney(10, 19), Heart(15, 20)                                       |
| <i>IL2RG</i>    | 2.036657811                                          | 3.61E <sup>-11</sup>                                 | Heart(15), Liver(26)                                                |
| <i>XCL2</i>     | 2.027650828                                          | 5.73E <sup>-08</sup>                                 | Kidney(10)                                                          |
| <i>FCGR3A</i>   | 2.024118189                                          | 6.86E <sup>-08</sup>                                 | Kidney(23), Heart(15)                                               |
| <i>ISG15</i>    | 2.022203685                                          | 2.99E <sup>-06</sup>                                 | Heart(14)                                                           |
| <i>CLEC4C</i>   | 2.005658346                                          | 2.42E <sup>-05</sup>                                 | Heart(14)                                                           |
| <i>IRF8</i>     | 1.995988235                                          | 7.12E <sup>-10</sup>                                 | Heart(27)                                                           |
| <i>HLA-DRA</i>  | 1.969404649                                          | 2.23E <sup>-11</sup>                                 | Kidney and Heart(22), Liver(17, 21)                                 |
| <i>CD3D</i>     | 1.938555344                                          | 2.29E <sup>-10</sup>                                 | Kidney(23, 25), Heart(15), Liver(17)                                |
| <i>CTSS</i>     | 1.894946302                                          | 4.84E <sup>-12</sup>                                 | Kidney and Heart(22), Heart(15)                                     |
| <i>LTB</i>      | 1.889930162                                          | 3.61E <sup>-05</sup>                                 | Kidney and Heart(22), Heart(14), Liver(17)                          |
| <i>GZMK</i>     | 1.889537791                                          | 2.71E <sup>-08</sup>                                 | Kidney and Heart(22), Heart(14)                                     |
| <i>CD2</i>      | 1.885599484                                          | 4.01E <sup>-08</sup>                                 | Kidney(23), Kidney and Heart(22), Heart(14), Liver(17, 21)          |
| <i>CD8A</i>     | 1.884316831                                          | 2.71E <sup>-08</sup>                                 | Kidney(10, 19, 23-25), Heart(14, 15), Liver(17)                     |
| <i>GNLY</i>     | 1.882614297                                          | 4.46E <sup>-05</sup>                                 | Kidney(28)                                                          |
| <i>C1QA</i>     | 1.861448083                                          | 1.09E <sup>-07</sup>                                 | Kidney and Heart(22)                                                |
| <i>CD163</i>    | 1.857206159                                          | 2.17E <sup>-06</sup>                                 | Kidney(23)                                                          |
| <i>CD53</i>     | 1.829408761                                          | 1.01E <sup>-11</sup>                                 | Kidney(23), Kidney and Heart(22), Heart(15)                         |
| <i>PTPRC</i>    | 1.823290478                                          | 9.13E <sup>-13</sup>                                 | Kidney and Heart(22), Heart(15)                                     |
| <i>CCR1</i>     | 1.817694789                                          | 5.10E <sup>-07</sup>                                 | Kidney(29, 30)                                                      |
| <i>CCL4</i>     | 1.799557075                                          | 2.11E <sup>-06</sup>                                 | Kidney(10)                                                          |
| <i>HLA-DPB1</i> | 1.794999976                                          | 3.70E <sup>-14</sup>                                 | Kidney(10), Heart(14)                                               |
| <i>SELPLG</i>   | 1.793854415                                          | 9.01E <sup>-16</sup>                                 | Kidney and Heart(22)                                                |
| <i>CTLA4</i>    | 1.78880823                                           | 5.18E <sup>-06</sup>                                 | Kidney(3, 8, 25, 31), Heart(13)                                     |
| <i>SH2D1A</i>   | 1.775909849                                          | 3.83E <sup>-09</sup>                                 | Kidney(25)                                                          |
| <i>PRF1</i>     | 1.771469169                                          | 9.88E <sup>-09</sup>                                 | Kidney(2-4, 7, 9-11, 19), Heart(12, 32)                             |
| <i>CD3G</i>     | 1.763318844                                          | 4.01E <sup>-08</sup>                                 | Liver(17)                                                           |
| <i>GZMA</i>     | 1.750937452                                          | 2.09E <sup>-08</sup>                                 | Kidney(10, 23), Heart(32, 33), Liver(26)                            |
| <i>HLA-DPA1</i> | 1.749449127                                          | 1.01E <sup>-11</sup>                                 | Kidney(10), Heart(14)                                               |
| <i>CCL5</i>     | 1.742809019                                          | 4.08E <sup>-07</sup>                                 | Kidney(10, 19, 23, 29, 34, 35), Kidney and Heart(22), Heart(15, 20) |
| <i>TNFSF13B</i> | 1.722516488                                          | 6.33E <sup>-08</sup>                                 | Kidney and Heart(22)                                                |
| <i>CYBB</i>     | 1.717387747                                          | 3.12E <sup>-08</sup>                                 | Kidney(23)                                                          |
| <i>LAMP3</i>    | 1.716565652                                          | 5.24E <sup>-06</sup>                                 | Kidney(30), Heart(14)                                               |

|          |             |                      |                                                        |
|----------|-------------|----------------------|--------------------------------------------------------|
| CD27     | 1.71537078  | 1.86E <sup>-07</sup> | Kidney(23), Heart(14, 36), Liver(17)                   |
| STAT1    | 1.714005729 | 2.82E <sup>-07</sup> | Kidney and Heart(22), Heart(15)                        |
| FCGR2A   | 1.698741423 | 1.09E <sup>-09</sup> | Kidney(23)                                             |
| LCP1     | 1.689301726 | 5.24E <sup>-11</sup> | Kidney(23), Kidney and Heart(22), Heart(14, 15)        |
| CD80     | 1.686424973 | 0.000756391          | Kidney(31), Heart(37)                                  |
| CCR5     | 1.68192851  | 1.98E <sup>-05</sup> | Kidney(18), Heart(14, 20)                              |
| CD48     | 1.679219002 | 1.69E <sup>-07</sup> | Kidney(23), Liver(17)                                  |
| CR1      | 1.675121323 | 6.60E <sup>-05</sup> | Kidney(25)                                             |
| HLA-DQA1 | 1.673744106 | 0.013162812          | Kidney and Heart(22), Heart(14)                        |
| CD83     | 1.670818169 | 4.77E <sup>-07</sup> | Liver(21)                                              |
| CXCR6    | 1.668507932 | 1.75E <sup>-06</sup> | Kidney(25)                                             |
| FCER1G   | 1.662460795 | 1.89E <sup>-09</sup> | Kidney(23), Kidney and Heart(22), Heart(15), Liver(17) |
| IL21R    | 1.66218193  | 3.24E <sup>-06</sup> | Kidney(24, 25), Heart(38), Liver(17)                   |
| ITGB2    | 1.660191473 | 6.22E <sup>-10</sup> | Kidney(23), Kidney and Heart(22), Heart(15, 27)        |
| IL2RA    | 1.659106244 | 1.19E <sup>-05</sup> | Kidney(8)                                              |
| MRC1     | 1.651088087 | 1.01E <sup>-07</sup> | Kidney(23)                                             |
| KLRK1    | 1.646248207 | 1.01E <sup>-07</sup> | Kidney(10, 39)                                         |
| CD247    | 1.63887623  | 2.31E <sup>-07</sup> | Kidney and Heart(22)                                   |
| C3AR1    | 1.620167907 | 1.01E <sup>-07</sup> | Heart(15)                                              |
| TNFRSF9  | 1.617281196 | 8.84E <sup>-06</sup> | Kidney(19)                                             |
| CD4      | 1.610947153 | 7.85E <sup>-13</sup> | Heart(14)                                              |
| CLECTA   | 1.603891284 | 9.56E <sup>-08</sup> | Kidney(19)                                             |
| CCR4     | 1.596704791 | 6.60E <sup>-05</sup> | Kidney(23)                                             |
| TLR8     | 1.592851237 | 2.71E <sup>-08</sup> | Kidney(40, 41)                                         |
| CD209    | 1.580960996 | 1.12E <sup>-05</sup> | Kidney(30)                                             |
| BST2     | 1.576819838 | 2.05E <sup>-07</sup> | Kidney and Heart(22)                                   |
| IL7R     | 1.565475358 | 4.23E <sup>-05</sup> | Kidney(23)                                             |
| HLA-DMB  | 1.564191477 | 1.96E <sup>-08</sup> | Kidney(19), Kidney and Heart(22)                       |
| TIGIT    | 1.563162051 | 3.64E <sup>-06</sup> | Kidney(19, 24, 25)                                     |
| LILRB1   | 1.553953951 | 5.86E <sup>-05</sup> | Kidney(10)                                             |
| MARCO    | 1.553703623 | 0.00053121           | Kidney(42)                                             |
| HLA-DQB1 | 1.542804204 | 0.017649896          | Kidney(10), Kidney and Heart(22), Liver(21)            |
| C2       | 1.542693492 | 4.30E <sup>-06</sup> | Kidney(41)                                             |
| IFI27    | 1.525854402 | 6.88E <sup>-05</sup> | Heart(14)                                              |
| SIGLEC1  | 1.523424602 | 1.24E <sup>-05</sup> | Kidney(43)                                             |
| CD3E     | 1.514546888 | 1.00E <sup>-06</sup> | Kidney(23)                                             |
| SELL     | 1.496460311 | 2.22E <sup>-05</sup> | Kidney and Heart(22), Liver(26)                        |
| CCR2     | 1.488987159 | 1.94E <sup>-06</sup> | Liver(17)                                              |
| TARP     | 1.483563718 | 1.69E <sup>-05</sup> | Heart(44)                                              |
| CD96     | 1.471749044 | 4.35E <sup>-07</sup> | Kidney(24, 25)                                         |
| CCL13    | 1.464536682 | 0.000766965          | Heart(14)                                              |
| MX1      | 1.46074994  | 0.000953455          | Kidney and Heart(22)                                   |
| CCL19    | 1.458698343 | 0.000602318          | Kidney(19), Kidney and Heart(22), Liver(17)            |
| ITGAL    | 1.450189741 | 2.51E <sup>-05</sup> | Heart(44)                                              |
| CD38     | 1.449036275 | 0.00027041           | Heart(14), Liver(21)                                   |
| FCGR2B   | 1.443028258 | 1.42E <sup>-10</sup> | Heart(14)                                              |
| LY96     | 1.440162539 | 3.23E <sup>-08</sup> | Kidney(23), Kidney and Heart(22)                       |
| CFB      | 1.436060987 | 4.58E <sup>-06</sup> | Heart(45)                                              |
| IFITM1   | 1.433847803 | 1.27E <sup>-06</sup> | Kidney(23)                                             |
| HAVCR2   | 1.429854578 | 3.16E <sup>-10</sup> | Kidney(46)                                             |
| ICOS     | 1.424698348 | 0.000513781          | Kidney(25, 31)                                         |
| LCK      | 1.423323638 | 7.89E <sup>-08</sup> | Kidney(23), Kidney and Heart(22), Liver(17)            |
| CD28     | 1.422732251 | 1.01E <sup>-05</sup> | Kidney(24, 25, 31)                                     |
| GZMH     | 1.42243173  | 2.22E <sup>-05</sup> | Heart(14)                                              |
| LTF      | 1.41457572  | 0.005932137          | Kidney(23)                                             |
| IL10RA   | 1.408137054 | 1.01E <sup>-11</sup> | Heart(14)                                              |
| CCR7     | 1.407974758 | 0.00196475           | Heart(14)                                              |
| VCAM1    | 1.400957189 | 6.67E <sup>-07</sup> | Heart(47), Liver(26)                                   |
| FOXP3    | 1.386625115 | 0.000365591          | Kidney(8, 9, 30, 48-50), Heart(51)                     |
| CD68     | 1.38359601  | 4.72E <sup>-07</sup> | Heart(15)                                              |
| KLRC2    | 1.382087803 | 0.000825181          | Heart(44)                                              |
| HLA-G    | 1.378184589 | 7.47E <sup>-06</sup> | Kidney and Heart(22)                                   |
| CD74     | 1.369125345 | 2.84E <sup>-06</sup> | Kidney and Heart(22), Heart(14, 15)                    |

|          |             |                      |                                                                    |
|----------|-------------|----------------------|--------------------------------------------------------------------|
| SELE     | 1.358885964 | 0.00316245           | Liver(26)                                                          |
| CX3CR1   | 1.348772914 | 1.75E <sup>-05</sup> | Kidney(52)                                                         |
| PDCD1    | 1.342678056 | 0.000779329          | Kidney(31)                                                         |
| IRF1     | 1.32916762  | 1.75E <sup>-05</sup> | Kidney(10, 19), Kidney and Heart(22)                               |
| INPP5D   | 1.326791502 | 1.42E <sup>-10</sup> | Kidney and Heart(22), Heart(14)                                    |
| C3       | 1.319632594 | 2.61E <sup>-05</sup> | Kidney(30, 31, 53, 54), Heart(45)                                  |
| HLA-DMA  | 1.312347193 | 3.88E <sup>-06</sup> | Kidney and Heart(22), Liver(21)                                    |
| CHIT1    | 1.307736078 | 0.022457808          | Kidney(42)                                                         |
| CD86     | 1.306149567 | 0.0002268            | Kidney(25, 31), Heart(37)                                          |
| IL12RB1  | 1.28710024  | 0.000325291          | Kidney(24, 25)                                                     |
| IRF7     | 1.279719469 | 0.0002268            | Kidney and Heart(22), Liver(55)                                    |
| PDCD1LG2 | 1.27704318  | 3.65E <sup>-06</sup> | Kidney(25), Heart(44)                                              |
| CXCL1    | 1.271792987 | 0.00884873           | Kidney(56)                                                         |
| CD274    | 1.257136507 | 0.000786564          | Kidney(25)                                                         |
| BTLA     | 1.241711508 | 0.000868284          | Kidney(24, 25)                                                     |
| LAIR2    | 1.241691117 | 0.000872268          | Heart(44)                                                          |
| AMICA1   | 1.237415871 | 8.14E <sup>-07</sup> | Liver(17)                                                          |
| CSF2     | 1.235232215 | 0.012196226          | Kidney(30)                                                         |
| TNFSF14  | 1.233606776 | 5.77E <sup>-05</sup> | Heart(14)                                                          |
| LTA      | 1.229292537 | 0.001841094          | Kidney(30)                                                         |
| JAK3     | 1.219381406 | 0.000584673          | Kidney(43)                                                         |
| ITGA4    | 1.202602679 | 1.86E <sup>-05</sup> | Liver(26)                                                          |
| ICAM1    | 1.196994857 | 8.93E <sup>-06</sup> | Kidney(18), Heart(14, 47)                                          |
| CD84     | 1.19436403  | 1.00E <sup>-08</sup> | Kidney(25)                                                         |
| CD6      | 1.178264638 | 0.000308299          | Kidney and Heart(22), Heart(44)                                    |
| LILRB3   | 1.175980408 | 0.00249483           | Heart(14)                                                          |
| HLA-DRB3 | 1.17242994  | 0.001982257          | Kidney and Heart(22)                                               |
| ITK      | 1.1723483   | 0.000500812          | Kidney(25), Heart(44)                                              |
| TNF      | 1.166604013 | 0.000584673          | Kidney(18, 57, 58), Heart(13)                                      |
| HCK      | 1.161271846 | 2.68E <sup>-05</sup> | Kidney(43)                                                         |
| CCL8     | 1.158072287 | 0.005584385          | Heart(27)                                                          |
| CD37     | 1.157267712 | 0.00295576           | Kidney(23)                                                         |
| ITGAM    | 1.152076995 | 2.05E <sup>-06</sup> | Heart(14)                                                          |
| MICB     | 1.150563386 | 1.19E <sup>-05</sup> | Kidney(23)                                                         |
| CFP      | 1.144262312 | 6.51E <sup>-05</sup> | Kidney and Heart(22)                                               |
| TAP1     | 1.142052487 | 4.94E <sup>-06</sup> | Kidney(10, 19, 25), Kidney and Heart(22), Heart(14, 15), Liver(21) |
| PSMB10   | 1.140090572 | 1.19E <sup>-05</sup> | Kidney and Heart(22), Heart(44)                                    |
| ZAP70    | 1.126096852 | 0.000175359          | Kidney and Heart(22), Heart(14)                                    |
| PSMB9    | 1.118659707 | 4.48E <sup>-05</sup> | Kidney(10, 19), Kidney and Heart(22)                               |
| TNFRSF1B | 1.118003216 | 2.69E <sup>-07</sup> | Kidney(23)                                                         |
| KLRD1    | 1.10995538  | 0.001220199          | Kidney(10)                                                         |
| CLECSA   | 1.104395359 | 0.000756391          | Kidney and Heart(22)                                               |
| CD40     | 1.103274453 | 4.80E <sup>-07</sup> | Kidney(31), Heart(14, 37)                                          |
| GZMM     | 1.102053892 | 0.003994252          | Heart(14)                                                          |
| IFIH1    | 1.096466865 | 0.000108958          | Heart(14)                                                          |
| HLA-B    | 1.093918753 | 5.47E <sup>-07</sup> | Kidney and Heart(22), Heart(14)                                    |
| XCR1     | 1.092025771 | 0.000858944          | Kidney and Heart(22)                                               |
| CXCL2    | 1.086420393 | 0.040542955          | Kidney(59)                                                         |
| ISG20    | 1.084887314 | 0.001771997          | Kidney(10), Kidney and Heart(22)                                   |
| IL2RB    | 1.076363405 | 0.000175639          | Kidney and Heart(22), Heart(15), Liver(26)                         |
| CD8B     | 1.076170759 | 0.001346439          | Kidney(25), Heart(14), Liver(17)                                   |
| CD14     | 1.068924112 | 0.001763805          | Kidney(23), Kidney and Heart(22), Heart(15)                        |
| NCF4     | 1.062393035 | 6.02E <sup>-05</sup> | Kidney(42)                                                         |
| CCL22    | 1.060626053 | 0.022042894          | Kidney(60)                                                         |
| TAP2     | 1.041351946 | 5.61E <sup>-05</sup> | Kidney(10)                                                         |
| LYN      | 1.041200598 | 0.00013837           | Heart(15)                                                          |
| PIK3CD   | 1.039168077 | 1.31E <sup>-05</sup> | Kidney and Heart(22)                                               |
| CD33     | 1.036837165 | 0.000108958          | Heart(14)                                                          |
| TNFRSF17 | 1.025477513 | 0.042732214          | Kidney(42), Heart(14)                                              |
| HLA-C    | 1.014680298 | 2.68E <sup>-05</sup> | Heart(14)                                                          |
| KLRB1    | 1.01282837  | 0.00128477           | Kidney(43)                                                         |
| PSMB8    | 1.007799043 | 1.43E <sup>-06</sup> | Kidney(19), Heart(15)                                              |

\*For each gene, the table provides the literature references where the gene is shown to be upregulated in human solid organ transplant biopsies during acute rejection compared to the biopsies collected during non-rejection.

### Supplementary Table 13. Genes unique to face transplant rejection.

36/202 genes upregulated in face transplant severe Grade 3 rejection (n = 11) (compared to non-rejection biopsies, Grade 0; n=10) were unique to face transplant rejection. Details of the 202 differentially expressed genes are listed in Supplementary Table 3. P values were obtained using the Wald test and adjusted using Benjamini-Hochberg procedure.

| Gene Symbol      | Log2 fold change<br>(Grade 0 vs. 3 in face<br>transplants) | Adjusted p value<br>(Grade 0 vs. 3 in face<br>transplants) | Functional Annotation        |
|------------------|------------------------------------------------------------|------------------------------------------------------------|------------------------------|
| <i>FUT7</i>      | 1.557799451                                                | 3.42E <sup>-05</sup>                                       | Skin homing                  |
| <i>HLA-DOB</i>   | 1.752992601                                                | 1.96E <sup>-08</sup>                                       | Immunoregulation             |
| <i>LY9</i>       | 1.492315019                                                | 1.53E <sup>-07</sup>                                       | Immunoregulation             |
| <i>LILRA4</i>    | 1.307366465                                                | 8.9E <sup>-03</sup>                                        | Immunoregulation             |
| <i>MEFV</i>      | 1.131552017                                                | 3.8E <sup>-03</sup>                                        | Immunoregulation             |
| <i>SOCS1</i>     | 1.263138008                                                | 5.02E <sup>-05</sup>                                       | Immunoregulation             |
| <i>TNFRSF11B</i> | 1.054912213                                                | 1.1E <sup>-02</sup>                                        | Immunoregulation             |
| <i>LY86</i>      | 1.728837002                                                | 7.25E <sup>-10</sup>                                       | Immunoregulation             |
| <i>CD180</i>     | 1.174706382                                                | 5.93E <sup>-03</sup>                                       | Immunoregulation             |
| <i>KIR3DL2</i>   | 1.054927913                                                | 4.66E <sup>-02</sup>                                       | Immunoregulation             |
| <i>KIR2DL3</i>   | 1.143001731                                                | 6.3E <sup>-03</sup>                                        | Immunoregulation             |
| <i>MSR1</i>      | 1.295051071                                                | 1.19E <sup>-05</sup>                                       | APC and innate cell adhesion |
| <i>ITGAX</i>     | 1.627537174                                                | 1.27E <sup>-06</sup>                                       | APC and innate cell adhesion |
| <i>CD97</i>      | 1.142879019                                                | 1.96E <sup>-08</sup>                                       | APC and innate cell adhesion |
| <i>F13A1</i>     | 1.472671683                                                | 9.84E <sup>-07</sup>                                       | APC and innate cell adhesion |
| <i>IRF4</i>      | 1.034578728                                                | 1.44E <sup>-03</sup>                                       | Type I interferon signaling  |
| <i>OAS3</i>      | 1.546994494                                                | 8.30E <sup>-06</sup>                                       | Type I interferon signaling  |
| <i>IFIT1</i>     | 1.132404496                                                | 7.68E <sup>-03</sup>                                       | Type I interferon signaling  |
| <i>IFIT2</i>     | 1.564689645                                                | 4.48E <sup>-05</sup>                                       | Type I interferon signaling  |
| <i>CD5</i>       | 1.383126435                                                | 1.27E <sup>-06</sup>                                       | Co-stimulation               |
| <i>TNFRSF4</i>   | 1.790937255                                                | 1.58E <sup>-06</sup>                                       | Co-stimulation               |
| <i>SPN</i>       | 1.110504202                                                | 5.8E <sup>-04</sup>                                        | Co-stimulation               |
| <i>CD1B</i>      | 1.522087168                                                | 5.4E <sup>-03</sup>                                        | Lipid presentation           |
| <i>CD1E</i>      | 1.168435387                                                | 1.7E <sup>-02</sup>                                        | Lipid presentation           |
| <i>CD1C</i>      | 1.093425001                                                | 1.28E <sup>-02</sup>                                       | Lipid presentation           |
| <i>CD79A</i>     | 1.339049379                                                | 2.96E <sup>-03</sup>                                       | B cell related               |
| <i>TNFSF13</i>   | 1.007161918                                                | 6.26E <sup>-03</sup>                                       | B cell related               |
| <i>BTK</i>       | 1.088264529                                                | 1.08E <sup>-05</sup>                                       | B cell related               |
| <i>CXCL3</i>     | 1.058356047                                                | 3.46E <sup>-02</sup>                                       | Chemokines and receptors     |
| <i>CCL3L1</i>    | 1.418558965                                                | 4.7E <sup>-03</sup>                                        | Chemokines and receptors     |
| <i>CMKLR1</i>    | 1.176747021                                                | 1.63E <sup>-06</sup>                                       | Chemokines and receptors     |
| <i>PIK3CG</i>    | 1.252822308                                                | 3.71E <sup>-06</sup>                                       | Other                        |
| <i>CSF3R</i>     | 1.130203545                                                | 6.02E <sup>-05</sup>                                       | Other                        |
| <i>SLC11A1</i>   | 1.109150197                                                | 3.51E <sup>-03</sup>                                       | Other                        |
| <i>STAT4</i>     | 1.144100101                                                | 3.33E <sup>-04</sup>                                       | Other                        |
| <i>CTSW</i>      | 1.482246845                                                | 7.47E <sup>-06</sup>                                       | Other                        |

**Supplementary Table 14. CDR3 sequences predicted to bind CD1b or CD1c by the GLIPH algorithm.**

| CD1b-associated sequences |                                  | CD1c-associated sequences |                                  |
|---------------------------|----------------------------------|---------------------------|----------------------------------|
| CASSRSSDRANNQPQHF         | CASSVLDLSLHNEQFF                 | CASKRRGVRKTYGYTF          | CASSLVPTGELFF                    |
| CASSQDNTGGASYEQYF         | CASSRRSHFVLDEQYF                 | CASIRNLP GKTYGYTF         | CASSLGGGPTGELFF                  |
| CASSFTSGRLLNTGELFF        | CASSRK FVLDEQYF                  | CASGSTR AARLVGDSRKTYGYTF  | CASSAPTGETQYF                    |
| CASRDGLAGGFKQETQYF        | CASSQHCVLDEQYF                   | CASAPIYPRKTYGYTF          | CASSPKTGRV IPEAFF                |
| CSVSQGLAYKSRANVLTF        | CASSQGPLNTGELFF                  | CSVSQGLAYKSRANVLTF        | CASSAGSLPHQPQHF                  |
| CSASKITSGVQETQYF          | CASSQGPFKAYNSPLHF                | CSASKITSGVQETQYF          | CSAREHTGHQPQHF                   |
| CSARLLEREQFF              | CASSQESASGNLNTGELFF              | CSARLLEREQFF              | CASSSAGHQ PQHF                   |
| CSARLLDFEAF               | CASSQDRLLAQHSPLHF                | CSARLLDFEAF               | CASSQERKETYEQYF                  |
| CGRQRKITQSRANVLTF         | CASSFVLDEQYF                     | CGRQRKITQSRANVLTF         | CASSQSRGWADTQYF                  |
| CAWSVLDREAEQYF            | CASRN RVLHVLDEQYF                | CAWSVLDREAEQYF            | CASRTIARKRYEQYF                  |
| CATSRKGYNSPLHF            | CASIKGGLNTGELFF                  | CAVRNTGGFKTIF             | CASKSRLENTEAFF                   |
| CASSYRFIPYYGYTF           | CASSSAGHQ PQHF                   | CATSRKGYNSPLHF            | CTSSEHCLCTSRANVLTF               |
| CASSVNVATVMQDTQYF         | CASSQERKETYEQYF                  | CASSYRFIPYYGYTF           | CTSR L C S C A Q S R A N V L T F |
| CASSVLDLSLHNEQFF          | CASSQSRGWADTQYF                  | CASSVNVATVMQDTQYF         | CTSRIRGLCTSRANVLTF               |
| CASSVDLTRKTYGYTF          | CASRTIARKRYEQYF                  | CASSVLDLSLHNEQFF          | CSVQGGQLAYKGRANVLTF              |
| CASSSKRSRKYTYGYTF         | CASKSRLENTEAFF                   | CASSVDLTRKTYGYTF          | CSAHHGGNTIYF                     |
| CASSSAGTGGFMNTEAFF        | CTSSEHCLCTSRANVLTF               | CASSSKRSRKYTYGYTF         | CGNYFKITQSRANVLTF                |
| CASSRYDSASQSRANVLTF       | CTSRQVCLRKTYGYTF                 | CASSSAGTGGFMNTEAFF        | CAWSLQCYRKTYGYTF                 |
| CASSRTGGGGYTF             | CTSRLLRLWRKYTYGYTF               | CASSRYDSASQSRANVLTF       | CAWLSRVIQSRANVLTF                |
| CASSRSRYHDKGRANVLTF       | CTSR L C S C A Q S R A N V L T F | CASSRTGGGGYTF             | CATSSNIGCGKTYGYTF                |
| CASSRRSPFVMQDTQYF         | CTSRIRGLCTSRANVLTF               | CASSRSSDRANNQPQHF         | CATSGRNSQSRANVLTF                |
| CASSRRSHFVLDEQYF          | CSVQGGQLAYKGRANVLTF              | CASSRSRYHDKGRANVLTF       | CASSYIIPICMQDTQYF                |
| CASSRRLATWHHQ PQHF        | CGSALRIRKTYGYTF                  | CASSRRSPFVMQDTQYF         | CASSYFWHHQPQHF                   |
| CASSRRGPFVMQDTQYF         | CGNYFKITQSRANVLTF                | CASSRRSHFVLDEQYF          | CASSVIMRKTYGYTF                  |
| CASSRQPICKRKNIQYF         | CAWSLQCYRKTYGYTF                 | CASSRRGPFVMQDTQYF         | CASSVGNPIFMQDTQYF                |
| CASSRNPILQRKNIQYF         | CAWLSRVIQSRANVLTF                | CASSRQPICKRKNIQYF         | CASSVDTGRKTQYF                   |
| CASSRK FVLDEQYF           | CATSSNIGCGKTYGYTF                | CASSRNPILQRKNIQYF         | CASSVCAPFIHNSPLHF                |
| CASSQKIATHARNTIYF         | CATSGRNSQSRANVLTF                | CASSRK FVLDEQYF           | CASSTWVISQSRANVLTF               |
| CASSQHCVLDEQYF            | CATSDFRGYNEQFF                   | CASSQKIATHARNTIYF         | CASSTPLPFVMQDTQYF                |
| CASSQGPLNTGELFF           | CATSDFLAGDTGELFF                 | CASSQHCVLDEQYF            | CASSTKGPIFDHQ PQHF               |
| CASSQGPFKAYNSPLHF         | CASSYIIPICMQDTQYF                | CASSQGPLNTGELFF           | CASSTHAWHRQSRANVLTF              |
| CASSQGIALRKTYGYTF         | CASSYGRPHGKTYGYTF                | CASSQGPFKAYNSPLHF         | CASSSVIPHGKTYGYTF                |
| CASSQGGGTYEQYF            | CASSVIMRKTYGYTF                  | CASSQGIALRKTYGYTF         | CASSSFPIFWHHQPQHF                |
| CASSQESASGNLNTGELFF       | CASSVGVGFKRGS DNEK LFF           | CASSQGGGTYEQYF            | CASSSRVTGRQSRANVLTF              |
| CASSQDRLLAQHSPLHF         | CASSVGNPIFMQDTQYF                | CASSQESASGNLNTGELFF       | CASSSPAKCHKSGQRPDF               |
| CASSQAGVFIHEQFF           | CASSVFFPICMQDTQYF                | CASSQDRLLAQHSPLHF         | CASSSNITRKTYGYTF                 |
| CASSPYCYRIQSRANVLTF       | CASSVDTGRKTQYF                   | CASSQDNTGGASYEQYF         | CASSMLQNRKTYGYTF                 |
| CASSPLAPIQRKNIQYF         | CASSTWVISQSRANVLTF               | CASSQAGVFIHEQFF           | CASSSFLHWHHQ PQHF                |
| CASSPFLHHS DNEQFF         | CASSTVCPIVMQDTQYF                | CASSPYCYRIQSRANVLTF       | CASSRRGKTYGYTF                   |
| CASSNTGGWGYTF             | CASSTPLPFVMQDTQYF                | CASSPLAPIQRKNIQYF         | CASSRQSPIVMQDTQYF                |

|                    |                    |                    |                         |
|--------------------|--------------------|--------------------|-------------------------|
| CASSNTGGGGYTF      | CASSTKGPIFDHQPHF   | CASSPFLHHSNEQFF    | CASSRLVRSRKIYGYTF       |
| CASSNTGGADYGYTF    | CASSTHAWHRQSRANVLT | CASSNTGGWGYTF      | CASSRHISRKTYGYTF        |
| CASSNIPPIVMQDTQYF  | CASSVIPHGKTYGYTF   | CASSNTGGGGYTF      | CASSQHHQPQHF            |
| CASSNALRTGKTYGYTF  | CASSRVTGRQSRANVLT  | CASSNTGGADYGYTF    | CASSPFNPMRKYGYTF        |
| CASSMQINGELFF      | CASSPAKCHKSGQPDF   | CASSNIPPIVMQDTQYF  | CASSPCATVMQDTQYF        |
| CASSLPVPMQDTQYF    | CASSNITRKYGYTF     | CASSNALRTGKTYGYTF  | CASSNRVATPIRTEAFF       |
| CASSLGSRSRKIYGYTF  | CASSSMLQNRKYGYTF   | CASSMQINGELFF      | CASSNMSIVRKYGYTF        |
| CASSLFRTLTKIYGYTF  | CASSSFAQNRKYGYTF   | CASSLPVPMQDTQYF    | CASSLRFMRKAYGYTF        |
| CASSLEDPFVMQDTQYF  | CASSRVPMRKYGYTF    | CASSLGSRSRKIYGYTF  | CASSLIDPICMQDTQYF       |
| CASSLDRANTIYF      | CASSRRLATWHHQPHF   | CASSLFRTLTKIYGYTF  | CASSLERTQSRANVLT        |
| CASSLAVSGFKNIQYF   | CASSRRGKTYGYTF     | CASSLEDPFVMQDTQYF  | CASSLCNESRKTYGYTF       |
| CASSKYCPMQRKNIQYF  | CASSRQSPVMQDTQYF   | CASSLDRANTIYF      | CASSLCKRSHKSRANVLT      |
| CASSKRSHEGKIYGYTF  | CASSRLVRSRKIYGYTF  | CASSLAVSGFKNIQYF   | CASSKMIHFHSDNEQFF       |
| CASSKRPGSRKYGYTF   | CASSRHISRKYGYTF    | CASSKYCPMQRKNIQYF  | CASSKLHSDNEQFF          |
| CASSKMRPFVMQDTQYF  | CASSQHHQPQHF       | CASSKRSHEGKIYGYTF  | CASSGVRPIFGNHQPQHF      |
| CASSKCVPICMQDTQYF  | CASSPGFKGKTYGYTF   | CASSKRPGSRKYGYTF   | CASSGPLRSHKSRANVLT      |
| CASSIWLQSRANVLT    | CASSPFNPMRKYGYTF   | CASSKMRPFVMQDTQYF  | CASSGGPICHEDTQYF        |
| CASSHNHRQSRANVLT   | CASSPCATVMQDTQYF   | CASSKCVPICMQDTQYF  | CASSGFISRQSRANVLT       |
| CASSHCDPARKTYGYTF  | CASSNRVATPIRTEAFF  | CASSIWLQSRANVLT    | CASSGEVPIKNIQYF         |
| CASSGVLPFVMQDTQYF  | CASSNMSIVRKYGYTF   | CASSHNHRQSRANVLT   | CASSGCSPISIHTEAFF       |
| CASSGSSKLQSRANVLT  | CASSLRFMRKAYGYTF   | CASSHCDPARKTYGYTF  | CASSGCEGSRKYGYTF        |
| CASSGSKANRKYGYTF   | CASSLIDPICMQDTQYF  | CASSGVLPFVMQDTQYF  | CASSFKLTLRKAYGYTF       |
| CASSGRNHFIHNSPLHF  | CASSLHSPFVMQDTQYF  | CASSGSSKLQSRANVLT  | CASSFCSPIFWHHQPHF       |
| CASSFWVRIGKTYGYTF  | CASSLGVQNRKYGYTF   | CASSGSKANRKYGYTF   | CASSEYLYPQSRANVLT       |
| CASSFVLDEQYF       | CASSLERTQSRANVLT   | CASSGRNHFIHNSPLHF  | CASSESRRHHQPQHF         |
| CASSFSVPMQDTQYF    | CASSLCNESRKTYGYTF  | CASSFWVRIGKTYGYTF  | CASSEHPQSRANVLT         |
| CASSFKGASGANVLT    | CASSLCKRSHKSRANVLT | CASSFVLDEQYF       | CASSEGPSIYARNTIYF       |
| CASSFIIPFVMQDTQYF  | CASSKTGFKNIQYF     | CASSFTSGRLLNTGELFF | CASSDVGPISDNEQFF        |
| CASSFIFFRVFSGNTIYF | CASSKMIHFHSDNEQFF  | CASSFSVPMQDTQYF    | CASSDRQANRKYGYTF        |
| CASSEINPIIHHNSPLHF | CASSGPLRSHKSRANVLT | CASSFKGASGANVLT    | CASSATDPIVMQDTQYF       |
| CASSEFKGTVSNQPQHF  | CASSGGPICHEDTQYF   | CASSFIIPFVMQDTQYF  | CASSAPATSNKSRANVLT      |
| CASSDMFPWHHQPHF    | CASSGFISRQSRANVLT  | CASSFIFFRVFSGNTIYF | CASRVCVTTQSRANVLT       |
| CASSCTGDIYQSRANVLT | CASSGEVPIKNIQYF    | CASSEINPIIHHNSPLHF | CASRTRLATHSDNEQFF       |
| CASSASQASRKTYGYTF  | CASSGCSPISIHTEAFF  | CASSEFKGTVSNQPQHF  | CASRLKVATWHHQPHF        |
| CASSALLVMQDTQYF    | CASSGCEGSRKYGYTF   | CASSDMFPWHHQPHF    | CASRIHGVQSRANVLT        |
| CASRVQIATIIHNSPLHF | CASSFKLTLRKAYGYTF  | CASSCTGDIYQSRANVLT | CASRGVLATLAHQPHF        |
| CASRTLWQHNSPLHF    | CASSEYLYPQSRANVLT  | CASSASQASRKTYGYTF  | CASRGSVLHSDNEQFF        |
| CASRTGLATHTHNSPLHF | CASSEHPQSRANVLT    | CASSALLVMQDTQYF    | CASRFRVATLHHQPQHF       |
| CASRNRVLHVLDEQYF   | CASSEGPSIYARNTIYF  | CASRVQIATIIHNSPLHF | CASRAPRKTYGYTF          |
| CASRLFIATRCNEKLF   | CASSDVGPISDNEQFF   | CASRTLWQHNSPLHF    | CASPSHVSRKIYGYTF        |
| CASRKSGAPRKTYGYTF  | CASSDRQANRKYGYTF   | CASRTGLATHTHNSPLHF | CASKVRKYGYTF            |
| CASRIDLAQSRANVLT   | CASSDFGSSYEYF      | CASRNRVLHVLDEQYF   | CASKRRGVRKYGYTF         |
| CASRFTSRTGKTYGYTF  | CASSATDPIVMQDTQYF  | CASRLFIATRCNEKLF   | CASIRNLPKTYGYTF         |
| CASRAPLATQRKNIQYF  | CASSAPATSNKSRANVLT | CASRKSGAPRKTYGYTF  | CASGSTRAARLVGDSRKTYGYTF |

CASKNGEYTSRANVLTF  
CASIKGGLNTGELFF  
CASGGLAAGQSRANVLTF  
CASFGRHSRKTYGYTF  
CASALFIPGKTYGYTF  
CARQSPMVRKTYGYTF  
CAIVMQDTQYF  
CASSFTSGRLLNTGELFF  
CSARLLEREQFF  
CSARLLDFEAF  
CAWSVLDREAEQYF

CASSAFSPFVMQDTQYF  
CASRVCVTTQSRANVLTF  
CASRTRLATHSDNEQFF  
CASRNKLATVMQDTQYF  
CASRLKVATWHHPQHF  
CASRIHGVQSRANVLTF  
CASRGLATLAHQPHF  
CASRGSVLHSDNEQFF  
CASRAPRKTYGYTF  
CASPSHVSRIYGYTF  
CASKVRKTYGYTF

CASRIDLAQSRANVLTF  
CASRFTSRTGKTYGYTF  
CASRDGLAGGFKQETQYF  
CASRAPLATQRKNIQYF  
CASKNGEYTSRANVLTF  
CASIKGGLNTGELFF  
CASGGLAAGQSRANVLTF  
CASFGRHSRKTYGYTF  
CASALFIPGKTYGYTF  
CARQSPMVRKTYGYTF  
CAIVMQDTQYF

CASAPIYPRKTYGYTF  
CASSLVPTGELFF  
CASSLGGGPTGELFF  
CASSAPTGETQYF



**Supplementary Table 15: Antibodies used for immunostaining.**

| Target           | Isotype      | Clone      | Manufacturer (Cat #)      | Concentration |
|------------------|--------------|------------|---------------------------|---------------|
| CD3              | mIgG2b       | C3e/1308   | Novus (NBP2-53387)        | 1:100         |
| CD3              | rbIgG        | polyclonal | Dako (A0452),             | 1:150         |
| Ki-67            | rbIgG        | sp6        | Abcam (ab16667)           | 1:1000        |
| Granzyme         | ratIgG2a     | 496B       | ThermoFisher (14-8889-82) | 1:200         |
| Granzyme         | rbIgG        | polyclonal | Abcam (ab53097)           | 1:300         |
| Perforin         | mIgG1        | 5B10       | ThermoFisher (MA5-12469)  | 1:100         |
| CD107a           | mIgG1        | H4A3       | BioLegend (328602)        | 1:100         |
| CD107a           | rbIgG        | D2D11      | Cell Signaling (9091)     | 1:200         |
| CD40L            | rbIgG        | D5J9Y      | Cell Signaling (54535),   | 1:50          |
| CD56             | mIgG1        | BC56C04    | Biocare Medical (CM164A)  | 1:100         |
| Caspase8/p43/p18 | mIgG2b       | 2B9H8      | ThermoFisher (66093-1-IG) | 1:100         |
| FOXP3            | mIgG1        | 206D       | Biolegend (320102)        | 1:100         |
| Mouse IgG2a      | Goat IgG     | polyclonal | Invitrogen (A21135)       | 1:1000        |
| Mouse IgG2a      | Goat IgG     | polyclonal | Invitrogen (A21241)       | 1:1000        |
| Mouse IgG2b      | Goat IgG     | polyclonal | Invitrogen (A21147)       | 1:1000        |
| Mouse IgG1       | Goat IgG     | polyclonal | Invitrogen (A21121)       | 1:1000        |
| Rabbit IgG       | Goat IgG     | polyclonal | Invitrogen (A32731)       | 1:1000        |
| Rabbit IgG       | Goat IgG     | polyclonal | Invitrogen (A21429)       | 1:1000        |
| Rabbit IgG       | Goat IgG     | polyclonal | Invitrogen (A32733)       | 1:1000        |
| Rabbit IgG       | Goat IgG     | polyclonal | Invitrogen (B2770)        | 1:1000        |
| Biotin           | Streptavidin | n/a        | ThermoFisher (S21381)     | 1:1000        |

## References

1. Borges TJ, O'Malley JT, Wo L, Murakami N, Smith B, Azzi J, et al. Codominant Role of Interferon-gamma- and Interleukin-17-Producing T Cells During Rejection in Full Facial Transplant Recipients. *Am J Transplant.* 2016;16(7):2158-71.
2. Lipman ML, Stevens AC, and Strom TB. Heightened intragraft CTL gene expression in acutely rejecting renal allografts. *J Immunol.* 1994;152(10):5120-7.
3. Strehlau J, Pavlakis M, Lipman M, Maslinski W, Shapiro M, and Strom TB. The intragraft gene activation of markers reflecting T-cell-activation and -cytotoxicity

- analyzed by quantitative RT-PCR in renal transplantation. *Clin Nephrol.* 1996;46(1):30-3.
4. Strehlau J, Pavlakis M, Lipman M, Shapiro M, Vasconcellos L, Harmon W, et al. Quantitative detection of immune activation transcripts as a diagnostic tool in kidney transplantation. *Proc Natl Acad Sci U S A.* 1997;94(2):695-700.
  5. Sharma VK, Bologa RM, Li B, Xu GP, Lagman M, Mouradian J, et al. Intrarenal display of cytotoxic attack molecules during rejection. *Transplant Proc.* 1997;29(1-2):1090-1.
  6. Desvaux D, Schwarzingler M, Pastural M, Baron C, Abtahi M, Berrehar F, et al. Molecular diagnosis of renal-allograft rejection: correlation with histopathologic evaluation and antirejection-therapy resistance. *Transplantation.* 2004;78(5):647-53.
  7. Carstens J, Markussen N, and Madsen M. The granule exocytosis and Fas/FasLigand pathways at the time of transplantation and during borderline and acute rejection of human renal allografts. *Transplant Proc.* 2005;37(8):3294-7.
  8. Dijke IE, Velthuis JH, Caliskan K, Korevaar SS, Maat AP, Zondervan PE, et al. Intragraft FOXP3 mRNA expression reflects antidonor immune reactivity in cardiac allograft patients. *Transplantation.* 2007;83(11):1477-84.
  9. Aquino-Dias EC, Joelsons G, da Silva DM, Berdichevski RH, Ribeiro AR, Veronese FJ, et al. Non-invasive diagnosis of acute rejection in kidney transplants with delayed graft function. *Kidney Int.* 2008;73(7):877-84.
  10. Reeve J, Einecke G, Mengel M, Sis B, Kayser N, Kaplan B, et al. Diagnosing rejection in renal transplants: a comparison of molecular- and histopathology-based approaches. *Am J Transplant.* 2009;9(8):1802-10.

11. Carstens J, Ozbay A, Torring C, and Hansen HE. Intragraft mRNA cytotoxic molecule expression in renal allograft recipients. *Transpl Immunol.* 2009;20(4):212-7.
12. Clement MV, Soulie A, Legros-Maida S, Guillet J, Gluckman E, Sigaux N, et al. Perforin and granzyme B: predictive markers for acute GVHD or cardiac rejection after bone marrow or heart transplantation. *Nouv Rev Fr Hematol.* 1991;33(6):465-70.
13. Ramsperger-Gleixner M, Spriewald BM, Tandler R, Kondruweit M, Amann K, Weyand M, et al. Increased transcript levels of TNF-alpha, TGF-beta, and granzyme B in endomyocardial biopsies correlate with allograft rejection. *Exp Clin Transplant.* 2011;9(6):387-92.
14. Holweg CT, Potena L, Luikart H, Yu T, Berry GJ, Cooke JP, et al. Identification and classification of acute cardiac rejection by intragraft transcriptional profiling. *Circulation.* 2011;123(20):2236-43.
15. Van Aelst LN, Summer G, Li S, Gupta SK, Heggermont W, De Vusser K, et al. RNA Profiling in Human and Murine Transplanted Hearts: Identification and Validation of Therapeutic Targets for Acute Cardiac and Renal Allograft Rejection. *Am J Transplant.* 2016;16(1):99-110.
16. Krams SM, Villanueva JC, Quinn MB, and Martinez OM. Expression of the cytotoxic T cell mediator granzyme B during liver allograft rejection. *Transpl Immunol.* 1995;3(2):162-6.
17. Asaoka T, Marubashi S, Kobayashi S, Hama N, Eguchi H, Takeda Y, et al. Intragraft transcriptome level of CXCL9 as biomarker of acute cellular rejection after liver transplantation. *J Surg Res.* 2012;178(2):1003-14.

18. Thamboo TP, Soong R, Wong LS, Ahmad B, Lim YC, and Teh M. Determination of a molecular signature of acute T-cell-mediated renal allograft rejection using quantitative real-time RT-PCR of 45 genes on a low density array. *Pathology*. 2011;43(1):72-5.
19. Oghumu S, Nori U, Bracewell A, Zhang J, Bott C, Nadasdy GM, et al. Differential gene expression pattern in biopsies with renal allograft pyelonephritis and allograft rejection. *Clin Transplant*. 2016;30(9):1115-33.
20. Fahmy NM, Yamani MH, Starling RC, Ratliff NB, Young JB, McCarthy PM, et al. Chemokine and receptor-gene expression during early and late acute rejection episodes in human cardiac allografts. *Transplantation*. 2003;75(12):2044-7.
21. Bonaccorsi-Riani E, Pennycuick A, Londono MC, Lozano JJ, Benitez C, Sawitzki B, et al. Molecular Characterization of Acute Cellular Rejection Occurring During Intentional Immunosuppression Withdrawal in Liver Transplantation. *Am J Transplant*. 2016;16(2):484-96.
22. Morgun A, Shulzhenko N, Perez-Diez A, Diniz RV, Sanson GF, Almeida DR, et al. Molecular profiling improves diagnoses of rejection and infection in transplanted organs. *Circ Res*. 2006;98(12):e74-83.
23. Flechner SM, Kurian SM, Head SR, Sharp SM, Whisenant TC, Zhang J, et al. Kidney transplant rejection and tissue injury by gene profiling of biopsies and peripheral blood lymphocytes. *Am J Transplant*. 2004;4(9):1475-89.
24. Reeve J, Sellares J, Mengel M, Sis B, Skene A, Hidalgo L, et al. Molecular diagnosis of T cell-mediated rejection in human kidney transplant biopsies. *Am J Transplant*. 2013;13(3):645-55.

25. Venner JM, Famulski KS, Badr D, Hidalgo LG, Chang J, and Halloran PF. Molecular landscape of T cell-mediated rejection in human kidney transplants: prominence of CTLA4 and PD ligands. *Am J Transplant.* 2014;14(11):2565-76.
26. Inkinen K, Lahesmaa R, Brandt A, Katajamaa M, Halme L, Hockerstedt K, et al. DNA microarray-based gene expression profiles of cytomegalovirus infection and acute rejection in liver transplants. *Transplant Proc.* 2005;37(2):1227-9.
27. Bodez D, Hocini H, Tchitchek N, Tisserand P, Benhaïem N, Barau C, et al. Myocardial Gene Expression Profiling to Predict and Identify Cardiac Allograft Acute Cellular Rejection: The GET-Study. *PLoS One.* 2016;11(11):e0167213.
28. Sarwal MM, Jani A, Chang S, Huie P, Wang Z, Salvatierra O, Jr., et al. Granulysin expression is a marker for acute rejection and steroid resistance in human renal transplantation. *Hum Immunol.* 2001;62(1):21-31.
29. Mayer V, Hudkins KL, Heller F, Schmid H, Kretzler M, Brandt U, et al. Expression of the chemokine receptor CCR1 in human renal allografts. *Nephrol Dial Transplant.* 2007;22(6):1720-9.
30. Wohlfahrtova M, Tycova I, Honsova E, Lodererova A, and Viklicky O. Molecular patterns of subclinical and clinical rejection of kidney allograft: quantity matters. *Kidney Blood Press Res.* 2015;40(3):244-57.
31. Hoffmann SC, Hale DA, Kleiner DE, Mannon RB, Kampen RL, Jacobson LM, et al. Functionally significant renal allograft rejection is defined by transcriptional criteria. *Am J Transplant.* 2005;5(3):573-81.

32. Griffiths GM, Namikawa R, Mueller C, Liu CC, Young JD, Billingham M, et al. Granzyme A and perforin as markers for rejection in cardiac transplantation. *Eur J Immunol.* 1991;21(3):687-93.
33. Alpert S, Lewis NP, Ross H, Fowler M, and Valentine HA. The relationship of granzyme A and perforin expression to cardiac allograft rejection and dysfunction. *Transplantation.* 1995;60(12):1478-85.
34. Pattison J, Nelson PJ, Huie P, von Leuttichau I, Farshid G, Sibley RK, et al. RANTES chemokine expression in cell-mediated transplant rejection of the kidney. *Lancet.* 1994;343(8891):209-11.
35. Hribova P, Kotsch K, Brabcova I, Vitko S, Volk HD, and Lacha J. Cytokines and chemokine gene expression in human kidney transplantation. *Transplant Proc.* 2005;37(2):760-3.
36. Morgun A, Shulzhenko N, Rampim GF, Chinellato AP, Diniz RV, Almeida DR, et al. Blood and intragraft CD27 gene expression in cardiac transplant recipients. *Clin Immunol.* 2003;107(1):60-4.
37. Akdere F, Bock O, Lehmann U, Serinsoz E, Haverich A, Kreipe H, et al. Quantitative mRNA expression analysis of co-stimulatory molecules in sequential biopsies from heart allografts. *Transpl Int.* 2005;18(10):1197-202.
38. Baan CC, Balk AH, Dijke IE, Korevaar SS, Peeters AM, de Kuiper RP, et al. Interleukin-21: an interleukin-2 dependent player in rejection processes. *Transplantation.* 2007;83(11):1485-92.

39. Seiler M, Brabcova I, Viklicky O, Hribova P, Rosenberger C, Pratschke J, et al. Heightened expression of the cytotoxicity receptor NKG2D correlates with acute and chronic nephropathy after kidney transplantation. *Am J Transplant.* 2007;7(2):423-33.
40. Dessing MC, Bemelman FJ, Claessen N, Ten Berge IJ, Florquin S, and Leemans JC. Intragraft Toll-like receptor profiling in acute renal allograft rejection. *Nephrol Dial Transplant.* 2010;25(12):4087-92.
41. Yang J, Snijders MLH, Haasnoot GW, van Kooten C, Mallat M, de Fijter JW, et al. Elevated intragraft expression of innate immunity and cell death-related markers is a risk factor for adverse graft outcome. *Transpl Immunol.* 2018;48:39-46.
42. Rodder S, Scherer A, Raulf F, Berthier CC, Hertig A, Couzi L, et al. Renal allografts with IF/TA display distinct expression profiles of metzincins and related genes. *Am J Transplant.* 2009;9(3):517-26.
43. Halloran PF, Venner JM, and Famulski KS. Comprehensive Analysis of Transcript Changes Associated With Allograft Rejection: Combining Universal and Selective Features. *Am J Transplant.* 2017;17(7):1754-69.
44. Halloran PF, Potena L, Van Huyen JD, Bruneval P, Leone O, Kim DH, et al. Building a tissue-based molecular diagnostic system in heart transplant rejection: The heart Molecular Microscope Diagnostic (MMDx) System. *J Heart Lung Transplant.* 2017;36(11):1192-200.
45. Keslar K, Rodriguez ER, Tan CD, Starling RC, and Heeger PS. Complement gene expression in human cardiac allograft biopsies as a correlate of histologic grade of injury. *Transplantation.* 2008;86(9):1319-21.

46. Ponciano VC, Renesto PG, Nogueira E, Rangel EB, Cenedeze MA, Franco MF, et al. Tim-3 expression in human kidney allografts. *Transpl Immunol.* 2007;17(3):215-22.
47. Zhang XP, Kelemen SE, and Eisen HJ. Quantitative assessment of cell adhesion molecule gene expression in endomyocardial biopsy specimens from cardiac transplant recipients using competitive polymerase chain reaction. *Transplantation.* 2000;70(3):505-13.
48. Bunnag S, Allanach K, Jhangri GS, Sis B, Einecke G, Mengel M, et al. FOXP3 expression in human kidney transplant biopsies is associated with rejection and time post transplant but not with favorable outcomes. *Am J Transplant.* 2008;8(7):1423-33.
49. Yapici U, Bemelman FJ, Scheepstra CG, Roelofs JJ, Claessen N, van der Loos C, et al. Intragraft FOXP3 protein or mRNA during acute renal allograft rejection correlates with inflammation, fibrosis, and poor renal outcome. *Transplantation.* 2009;87(9):1377-80.
50. Dummer CD, Carpio VN, da Silva Loreto M, Joelsons G, Carraro DM, Olivieri ER, et al. Analysis of FOXP3 gene and protein expressions in renal allograft biopsies and their association with graft outcomes. *Ren Fail.* 2013;35(4):521-30.
51. Wang S, Li J, Xie A, Wang G, Xia N, Ye P, et al. Dynamic changes in Th1, Th17, and FoxP3+ T cells in patients with acute cellular rejection after cardiac transplantation. *Clin Transplant.* 2011;25(2):E177-86.
52. Sarwal M, Chua MS, Kambham N, Hsieh SC, Satterwhite T, Masek M, et al. Molecular heterogeneity in acute renal allograft rejection identified by DNA microarray profiling. *N Engl J Med.* 2003;349(2):125-38.



53. Akalin E, Hendrix RC, Polavarapu RG, Pearson TC, Neylan JF, Larsen CP, et al. Gene expression analysis in human renal allograft biopsy samples using high-density oligoarray technology. *Transplantation*. 2001;72(5):948-53.
54. Serinsoz E, Bock O, Kirsch T, Haller H, Lehmann U, Kreipe H, et al. Compartment-specific quantitative gene expression analysis after laser microdissection from archival renal allograft biopsies. *Clin Nephrol*. 2005;63(3):193-201.
55. Minisini R, Giarda P, Grossi G, Bitetto D, Toniutto P, Falletti E, et al. Early activation of interferon-stimulated genes in human liver allografts: relationship with acute rejection and histological outcome. *J Gastroenterol*. 2011;46(11):1307-15.
56. Modena BD, Kurian SM, Gaber LW, Waalen J, Su AI, Gelbart T, et al. Gene Expression in Biopsies of Acute Rejection and Interstitial Fibrosis/Tubular Atrophy Reveals Highly Shared Mechanisms That Correlate With Worse Long-Term Outcomes. *Am J Transplant*. 2016;16(7):1982-98.
57. Morel D, Normand E, Lemoine C, Merlio JP, Velours J, Astier T, et al. Tumor necrosis factor alpha in human kidney transplant rejection--analysis by in situ hybridization. *Transplantation*. 1993;55(4):773-7.
58. Lacha J, Hribova P, Kotsch K, Brabcova I, Bartosova K, Volk HD, et al. Effect of cytokines and chemokines (TGF-beta, TNF-alpha, IL-6, IL-10, MCP-1, RANTES) gene polymorphisms in kidney recipients on posttransplantation outcome: influence of donor-recipient match. *Transplant Proc*. 2005;37(2):764-6.
59. Grandaliano G, Gesualdo L, Ranieri E, Monno R, Stallone G, and Schena FP. Monocyte chemotactic peptide-1 expression and monocyte infiltration in acute renal transplant rejection. *Transplantation*. 1997;63(3):414-20.

60. Lo DJ, Weaver TA, Kleiner DE, Mannon RB, Jacobson LM, Becker BN, et al.  
Chemokines and their receptors in human renal allotransplantation. *Transplantation*.  
2011;91(1):70-7.
